# Supplementary material for: Dissected antiporter modules establish minimal proton-conduction elements of the respiratory complex I
Source: Springer Nature journal article supplement (doi:10.1038/s41467-024-53194-5), 2024-10-22
Supplement: MOESM1 [file 41467_2024_53194_MOESM1_ESM.pdf]

# Supplementary Information

## Dissected Antiporter Modules Establish Minimal Proton-Conduction Elements of the Respiratory Complex I

Adel Beghiah<sup>1</sup>, Patricia Saura<sup>1,a</sup>, Sofia Badolato<sup>1,a</sup>, Hyunho Kim<sup>1</sup>, Johanna Zipf<sup>1</sup>, Dirk Auman<sup>1</sup>, Ana P. Gamiz-Hernandez<sup>1</sup>, Johan Berg<sup>1</sup>, Grant Kemp<sup>1</sup>, Ville R. I. Kaila<sup>1,\*</sup>

<sup>1</sup> Department of Biochemistry and Biophysics, Stockholm University, 10691, Stockholm, Sweden.

<sup>a</sup> These authors contributed equally.

\*Corresponding author: Ville R. I. Kaila, **E-mail:** ville.kaila@dbb.su.se

### Content

**Supplementary Figure 1** | MD simulations of the dissected antiporter-like subunits.  
**Supplementary Figure 2** | Analysis of the proton channels in Nqo13 constructs.  
**Supplementary Figure 3** | Analysis of the proton channels in Nqo12<sup>ATH</sup> constructs.  
**Supplementary Figure 4** | Effect of the membrane composition and protein-lipid interactions  
**Supplementary Figure 5** | Ion-pair dynamics in Nqo13 and Nqo12<sup>ATH</sup> constructs.  
**Supplementary Figure 6** | Simulations details of the QM/MM calculations.  
**Supplementary Figure 7** | Analytical model geometry for electrostatic tuning effects.  
**Supplementary Figure 8** | Electric field effects along the proton transfer pathways.  
**Supplementary Figure 9** | Benchmarking the proton transfer energetics.  
**Supplementary Figure 10** | Construct design, expression, purification and stability of dissected antiporter-like modules.  
**Supplementary Figure 11** | Biophysical characterisation of proton conduction properties in dissected antiporter-like modules.  
**Supplementary Figure 12** | Calibration of pyranine fluorescence and data fitting.  
**Supplementary Figure 13** | Kinetic optimisation and characterisation of proton conduction in proteoliposomes.  
**Supplementary Figure 14** | Protonation dynamics in (proteo)liposomes reconstituted with ATP synthase.  
**Supplementary Figure 15** | Kinetic analysis of proton conduction in F<sub>1</sub>F<sub>o</sub>-Nqo proteoliposomes.  
**Supplementary Figure 16** | Analysis of pK<sub>a</sub> tuning effects in the dissected antiporter-like subunit and the intact Complex I.  
**Supplementary Figure 17** | Formation of a Nqo12-Nqo13 complex.  
**Supplementary Figure 18** | Sequence conservation in Nqo12 and Nqo13.  
**Supplementary Figure 19** | Hydration analysis of the protein-lipid interface in the isolated antiporter constructs and in the full Complex I.  
**Supplementary Table 1** | Steady-state pH levels and kinetics of proton transfer  
**Supplementary Table 2** | Orientation of Nqo modules in proteoliposomes by NTA-Atto 647N labelling.  
**Supplementary Table 3** | Predicted pK<sub>a</sub>s of dissected antiporter-like subunit relative to the intact Complex I.  
**Supplementary Table 4** | List of MD simulations.  
**Supplementary Table 5** | List of designed primers.  
**Supplementary Table 6** | Sequences of studied Nqo constructs.  
**Supplementary Table 7** | Expression strains and tested plasmids.  
**Supplementary Table 8** | Benchmarking the proton transfer energetics.  
**Supplementary Table 9** | List of QM/MM simulations.

### Supplementary Methods

Derivation of an analytical model for ion-pair induced barrier tuning  
Poisson-Boltzmann Electrostatic with Monte Carlo sampling  
Analysis of hydration profiles  
Constant-pH MD simulations

### Supplementary Discussion

### Supplementary References

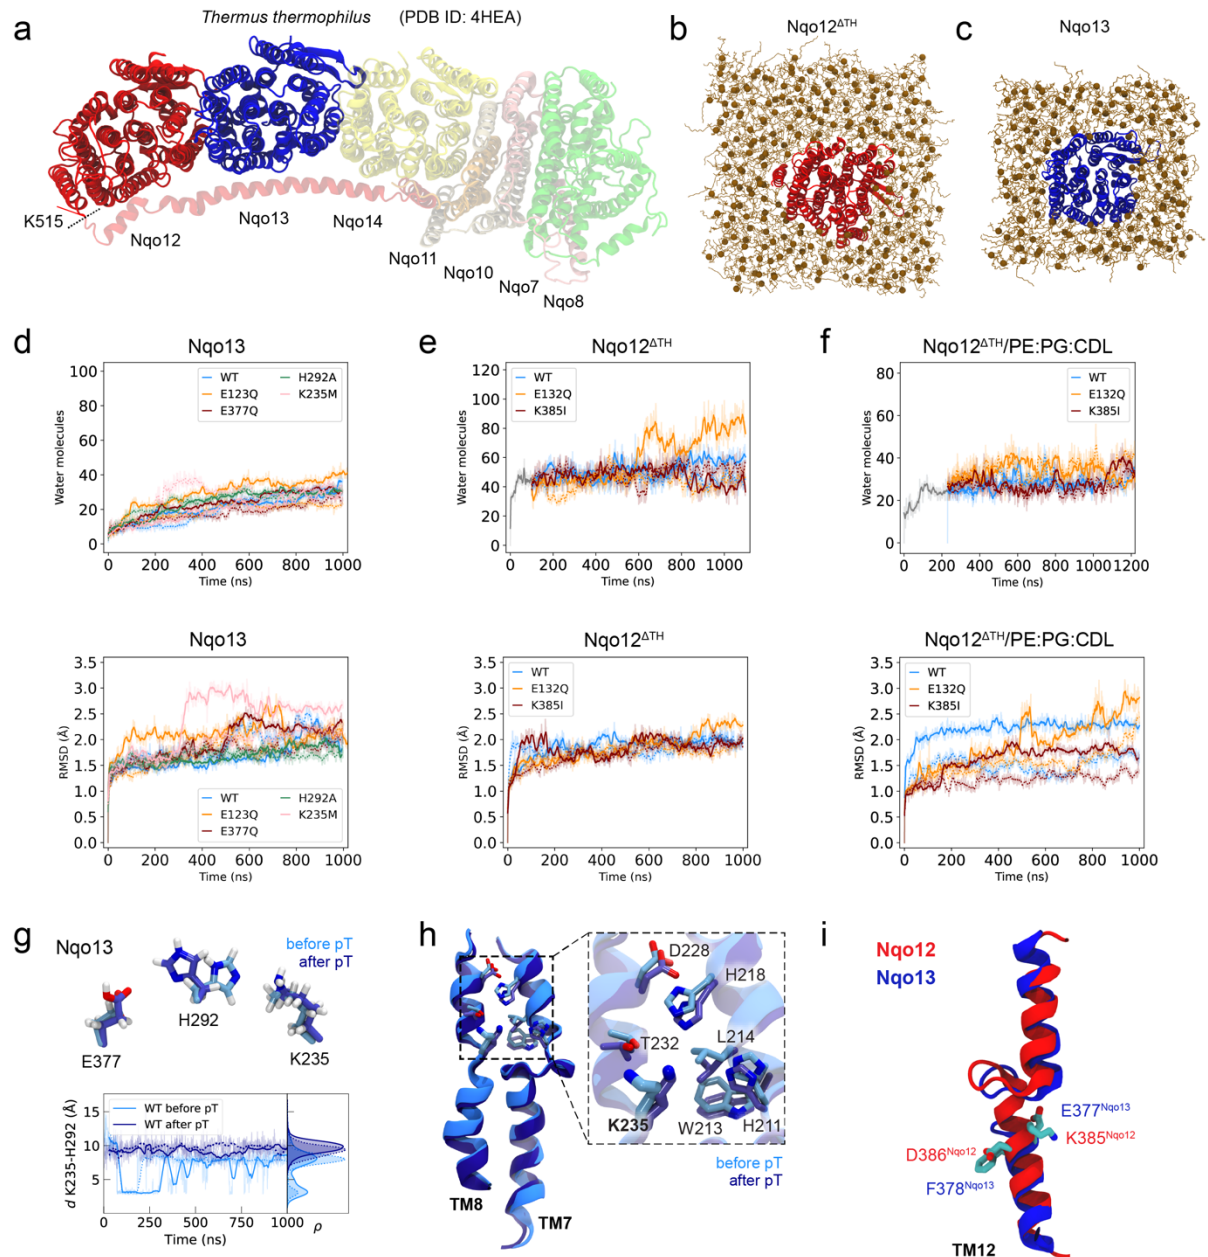

**Supplementary Figure 1 | MD simulation of the dissected antiporter-like subunits.** **a)** The coordinates of Nqo12 and Nqo13 were obtained from *T. thermophilus* Complex I (PDB ID: 4HEA). The transverse helix of Nqo12 was removed by truncating the protein at position 515 (Nqo12<sup>ΔTH</sup>), leaving Lys515 as the new C-terminus. **b)** Nqo12<sup>ΔTH</sup> and **c)** Nqo13 embedded in a POPC lipid membrane (see *Methods*). **d-f)** RMSD (*bottom*) and number of water molecules within 5 Å of proton pathway (*top*) during the MD simulations of Nqo13 and Nqo12<sup>ΔTH</sup> constructs. **e, f)** Probing the effect of the membrane composition for the different Nqo12<sup>ΔTH</sup> constructs with MD simulations in **e)** POPC, and **f)** POPE:POPG:CDL membranes. **g)** *Top*: conformation of residues along the lateral proton pathway in Nqo13 (light blue: Lys235<sup>+</sup>/His292<sup>0</sup>/Glu377<sup>-</sup>, dark blue: Lys235<sup>+</sup>/His292<sup>0</sup>/Glu377<sup>0</sup>). *Bottom*: Distance between Lys235 (N $\epsilon$ ) and His292 (N $\delta$ ) during MD simulations in Lys235<sup>+</sup>/His292<sup>0</sup>/Glu377<sup>-</sup> (light blue) Lys235<sup>+</sup>/His292<sup>0</sup>/Glu377<sup>0</sup> (dark blue) states. **h)** Conformational changes in conserved residues in TM7 and TM8 at the N-side proton pathway, upon proton transfer from Lys235 to Glu377 (light blue, before / dark blue, after proton transfer). **i)** Alignment of TM12 helix in Nqo12 (red) and Nqo13 (blue), showing the position of the terminal residues along the proton pathway (K385<sup>Nqo12</sup>, E377<sup>Nqo13</sup>) and the P-side exit (D386<sup>Nqo12</sup>, F378<sup>Nqo13</sup>). Data are provided in the Source Data file.

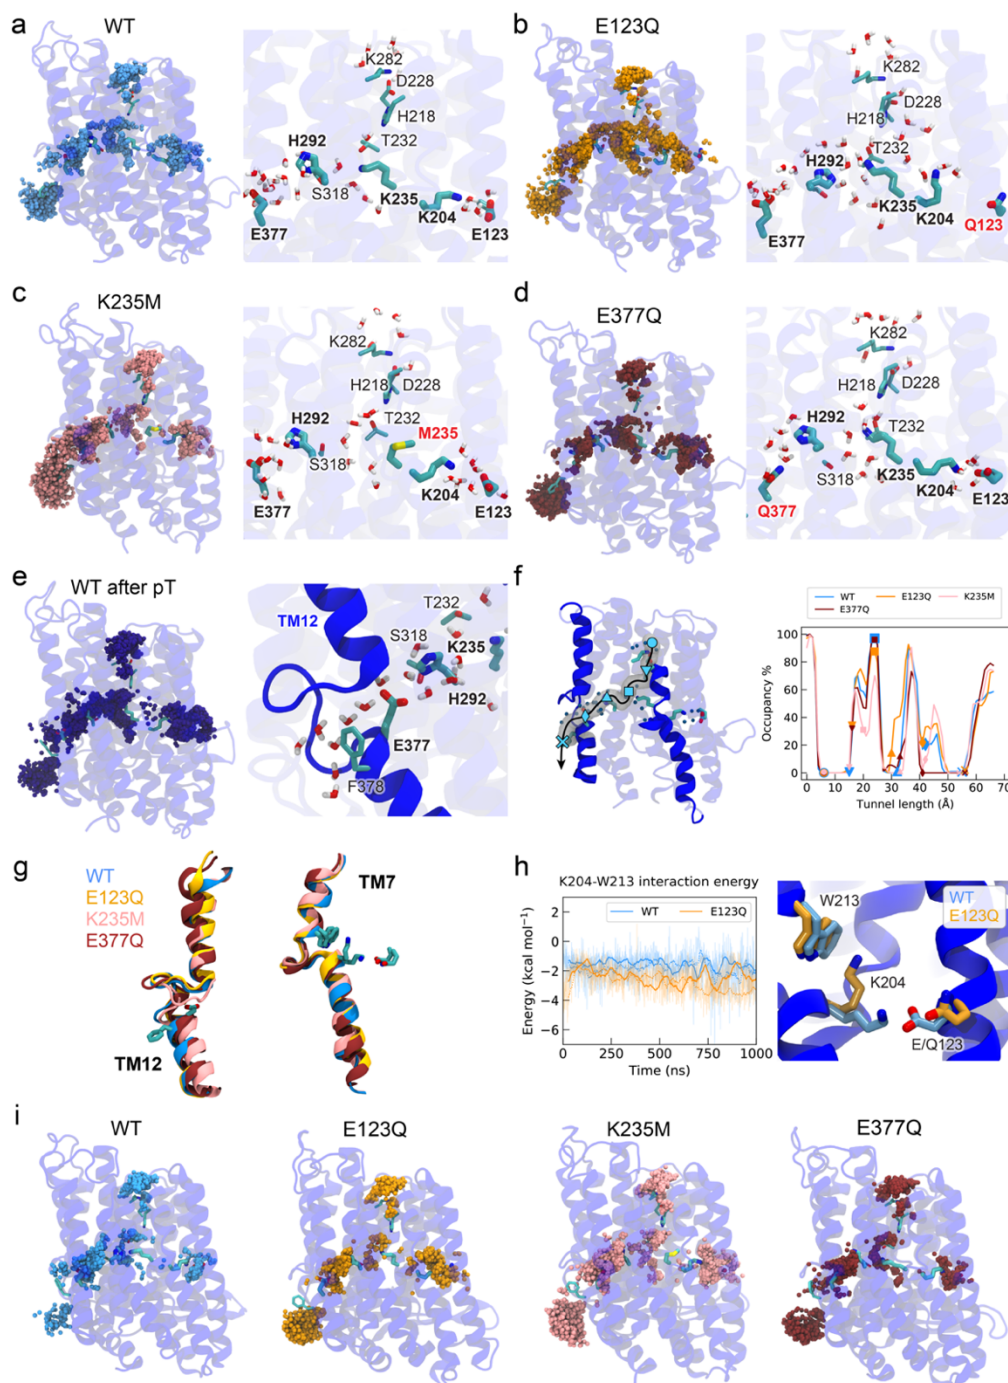

**Supplementary Figure 2 | Analysis of the proton channels in Nqo13 constructs.** **a-f** *Left*: Hydration along the proton transfer pathway and ion-pair region, averaged over 1  $\mu$ s MD simulations. *Right*: MD snapshot showing water connectivity and polar residues for **a**) WT before proton transfer from Lys235 to Glu377, **b**) E123Q, **c**) K235M, **d**) E377Q and **e**) WT after proton transfer from Lys235 to Glu377, with TM12 shown in solid colour (*inset, right*). **f**) Hydration level along the proton pathways for the different Nqo13 variants. Probe sites are indicated with symbols in the structure (*left*) and the hydration profile (*right*). **g**) Conformations of the transmembrane broken helices TM12 and TM7 in the different Nqo13 constructs. **h**) The conserved Trp213 stabilises Lys204 by  $\pi$ -cation interactions in the open ion-pair conformation. The figure shows the interaction energy between Lys204-Trp213 (*left*) and structures from MD simulations (from independent replicas) of WT and E123Q (*right*). **i**) Hydration along the proton pathways in the Nqo13 constructs (WT, E123Q, K235M and E377Q). The data is averaged over 0.5  $\mu$ s MD simulations in a PE:PG:CDL membrane (see Methods). Data are provided in the Source Data file.

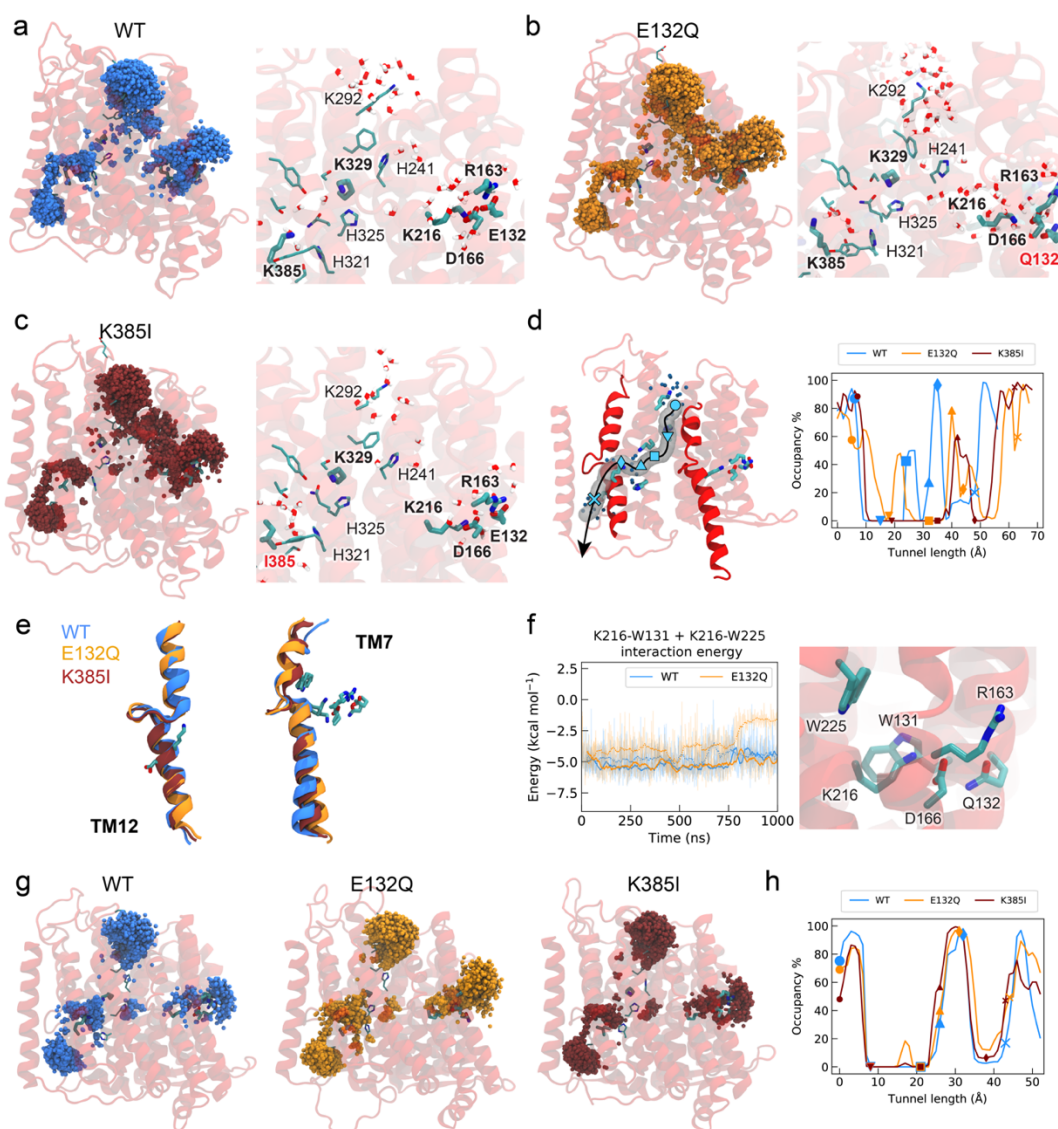

**Supplementary Figure 3 | Analysis of the proton channels in Nqo12<sup>ATH</sup> constructs.** **a-c)** *Left:* Hydration along the proton transfer pathway and ion-pair region, averaged over 1 μs simulations in a POPC membrane. *Right:* MD snapshot showing water connectivity and polar residues in **a)** WT, **b)** E132Q, and **c)** K385I. **d)** Hydration level along the proton pathways (*left*) for the different Nqo12<sup>ATH</sup> constructs. **e)** Conformation of the transmembrane broken helices TM12 and TM7 in the different Nqo12<sup>ATH</sup> constructs. **f)** Trp225/Trp131-K216 interaction in WT and ion-pair mutant. **g)** Hydration along the proton pathways in the Nqo12<sup>ATH</sup> constructs (WT, E132Q, and K385I). The data is averaged over 1 μs MD simulations in a PE:PG:CDL membrane (see *Methods*). **h)** Hydration profile along the proton pathway in the Nqo12<sup>ATH</sup> constructs. Data are provided in the Source Data file.



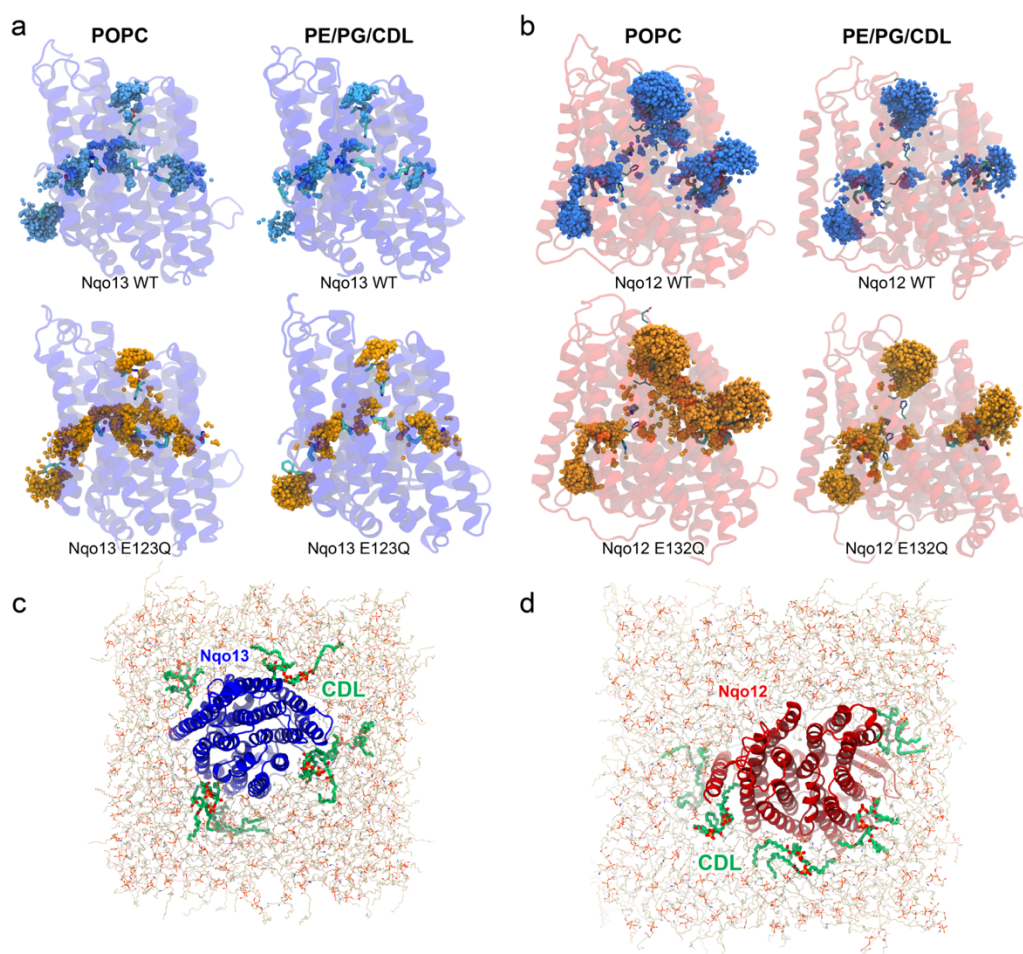

**Supplementary Figure 4 | Effect of the membrane composition and protein-lipid interactions. a, b)** Hydration along the proton pathways in (a) Nqo13 and (b) Nqo12<sup>ΔTH</sup> constructs in a pure POPC membrane and in a PE:PG:CDL mixture for the WT (water molecules in blue) and ion-pair mutant (water molecules in orange) simulations. **c, d)** Cardiolipin (CDL) molecules stabilise the protein-lipid interface in the MD simulations with the PE:PG:CDL membrane for **c**, Nqo13 and **d**, Nqo12<sup>ΔTH</sup>.

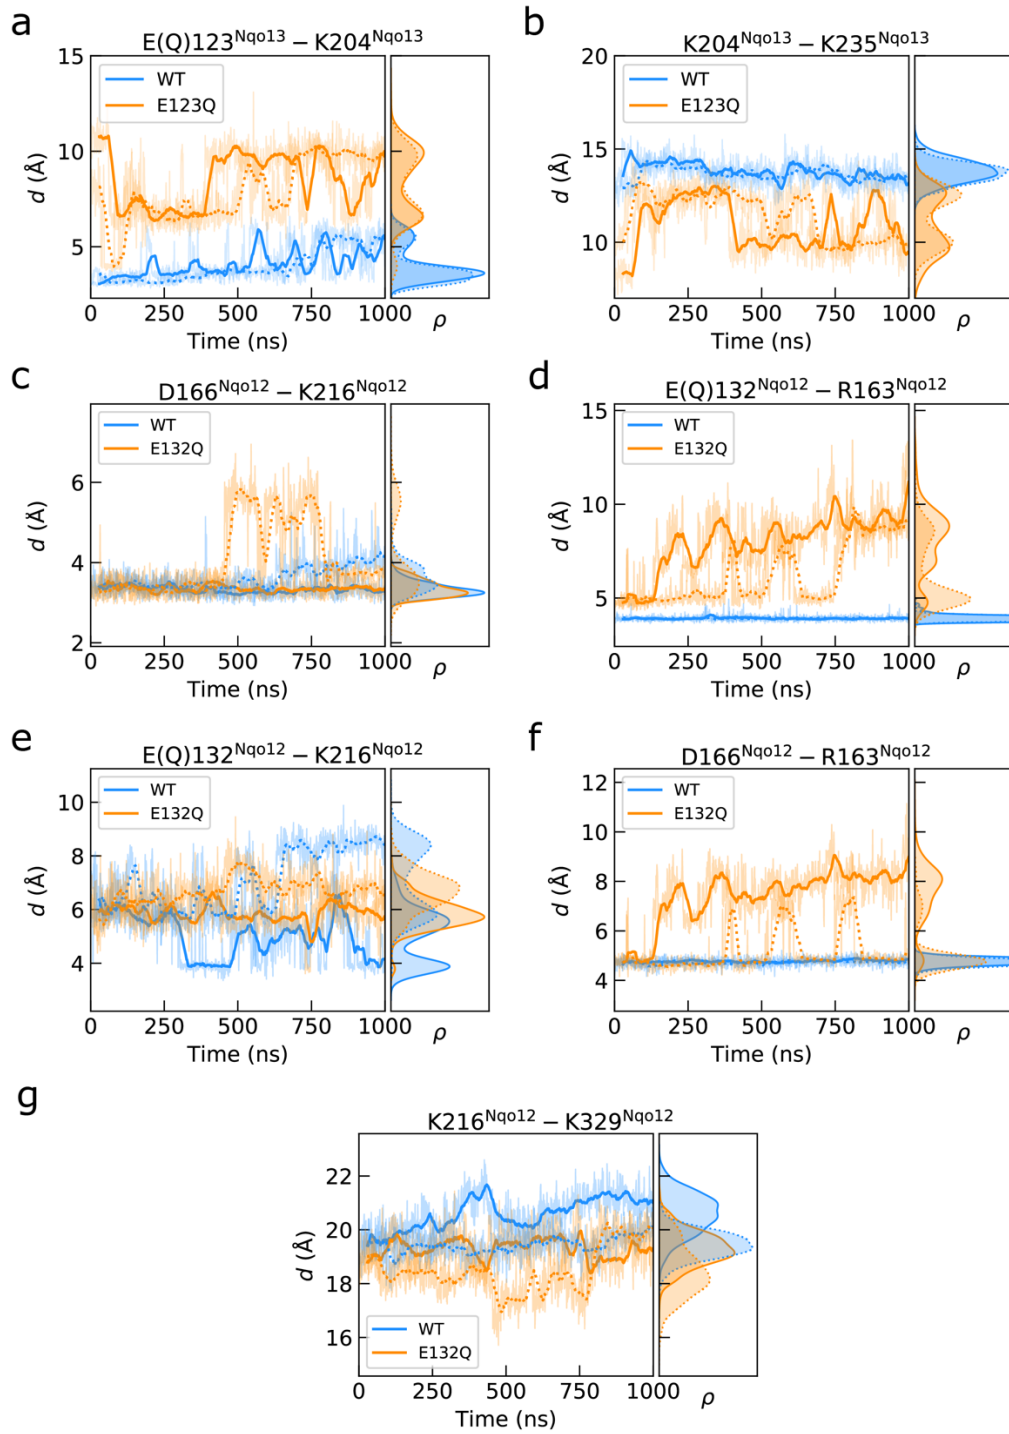

**Supplementary Figure 5 | Ion-pair dynamics in Nqo13 and Nqo12<sup>ATH</sup> constructs.** Blue traces correspond to WT, and orange traces to ion-pair mutant constructs. Distances between **a)** E/Q123-K204 and **b)** K204-K235 in Nqo13. Distances between **c)** D166/K216, **d)** E/Q132-R163, **e)** E/Q132-K216, **f)** D166-R163), and **g)** K216-K329 in Nqo12<sup>ATH</sup>. Data are provided in the Source Data file.

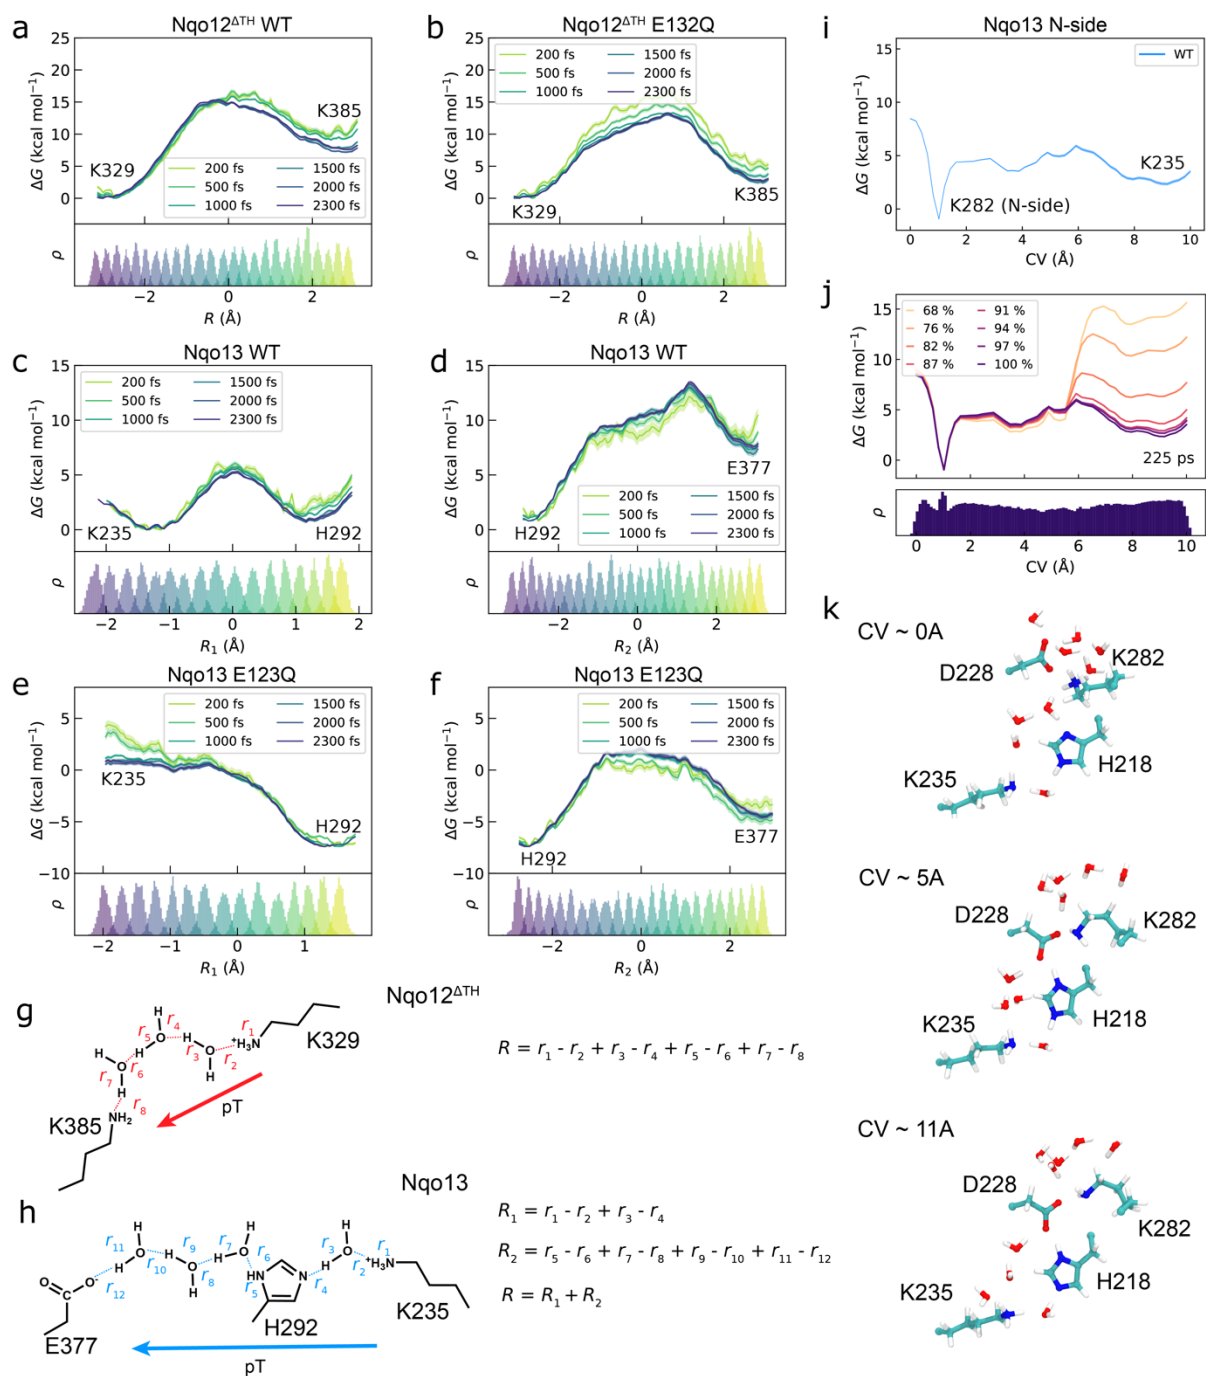

**Supplementary Figure 6 | Simulation details of the QM/MM calculations.** **a-f)** Convergence of free energy profiles (top) and overlap of the umbrella sampling windows (*bottom*) for the lateral proton transfer reactions in the different systems. Proton transfer from K329 to K385 in **a)** WT and **b)** E132Q variant of Nqo12<sup>ΔTH</sup>. Proton transfer from **c)** K235 to H292 and **d)** H292 to E377 in WT-Nqo13. Proton transfer from **e)** K235 to H292 and **f)** H292 to E377 in E123Q -Nqo13. **g-h)** The reaction coordinate ( $R$ ) for the lateral proton transfer reaction in **g)** Nqo12<sup>ΔTH</sup> and **h)** Nqo13, defined as a linear combination of bond-breaking and bond-forming distances. **i)** The free energy of proton uptake from the N-side to the middle Lys235 in Nqo13, using the modified centre of excess charge (mCEC) as a reaction coordinate / collective variable (CV (Å), see *Methods*). **j)** Convergence of the MWE-QM/MM free energy profiles with increasing sampling time. **k)** Snapshots along the N-side proton transfer reaction at different CVs, from the N-side (CV = 0 Å) to the middle Lys235 (CV = 11 Å). Data are provided in the Source Data file.

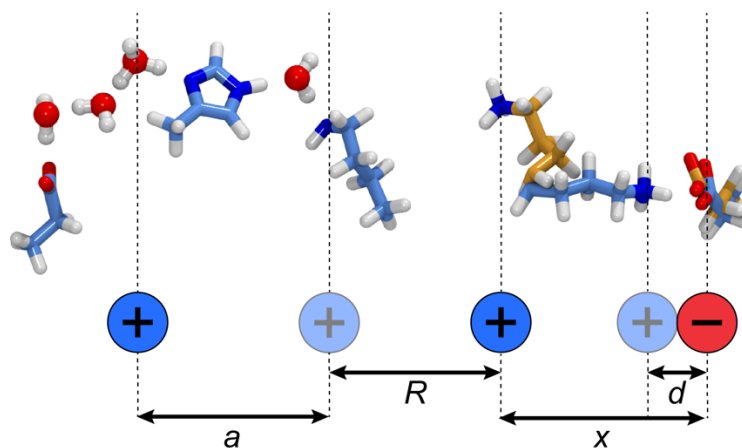

**Supplementary Figure 7 | Analytical model geometry for electrostatic tuning effects.**  $R$  - distance between ‘middle Lys’ and ‘ion-pair Lys’;  $d$  - distance between ion-pairs in closed conformation;  $x$  - distance between ion-pairs in the open conformation;  $a$  - position of transition state relative to the ‘middle Lys’.



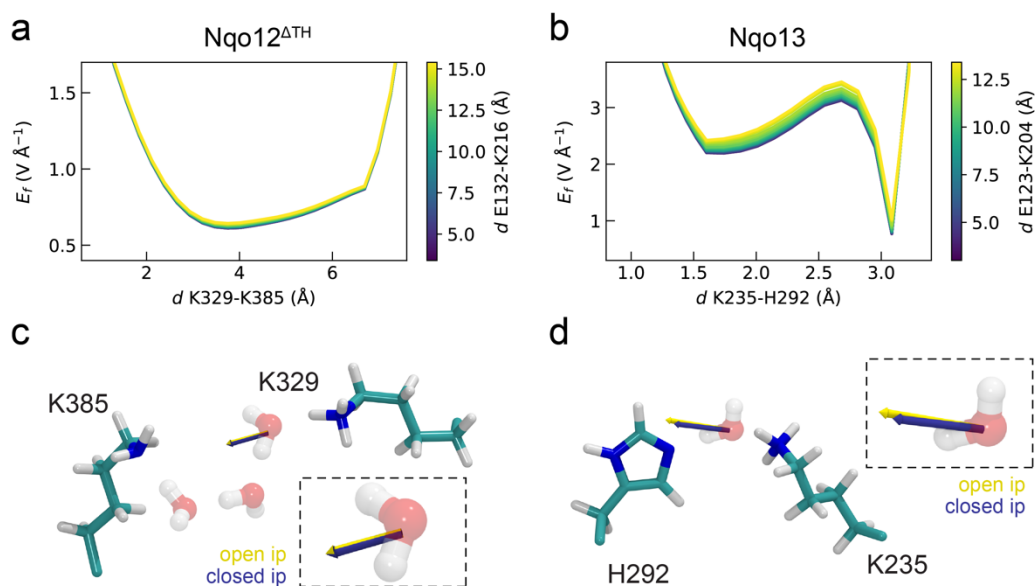

**Supplementary Figure 8 | Electric field effects along the proton transfer pathways.** Opening of the ion-pair induces an electric field along the proton transfer pathway in QM/MM calculations. **a)** Electric field strength along the proton transfer pathway from K329 to K385, with varying K216-E132 ion-pair distances (closed conformation in blue, open conformation in yellow) for Nqo12. **b)** Electric field strength along the proton transfer pathway from K235 to H292, with varying K204-E123 ion-pair distances (closed conformation in blue, open conformation in yellow) for Nqo13. **c-d)** Electric field vectors (closed ion-pair (blue)/open ion-pair (yellow)) for proton pathways in **c)** Nqo12 and **d)** Nqo13. Insets show a closeup of the electric field vectors. Data are provided in the Source Data file.

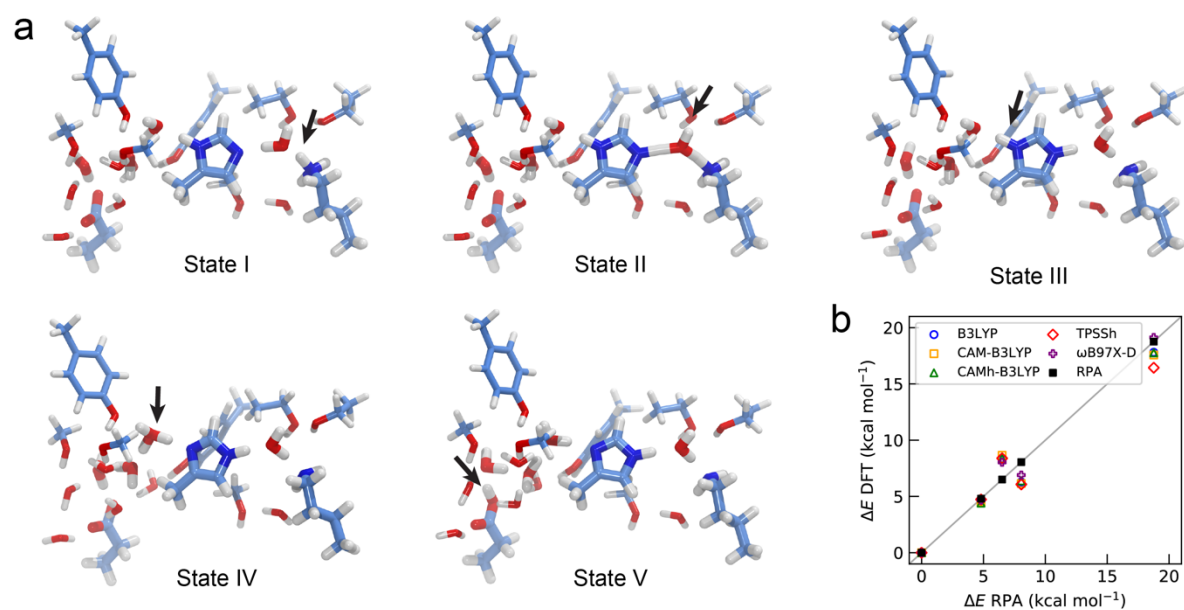

**Supplementary Figure 9 | Benchmarking the proton transfer energetics.** **a)** QM model systems, comprising 137 atoms, employed for the benchmarking calculations of the proton transfer reactions. The position of the proton in the different states (states I - V) is indicated by an arrow. **b)** DFT electronic energies with different functionals vs. RPA energies. See also Supplementary Table 8. Data are provided in the Source Data file.

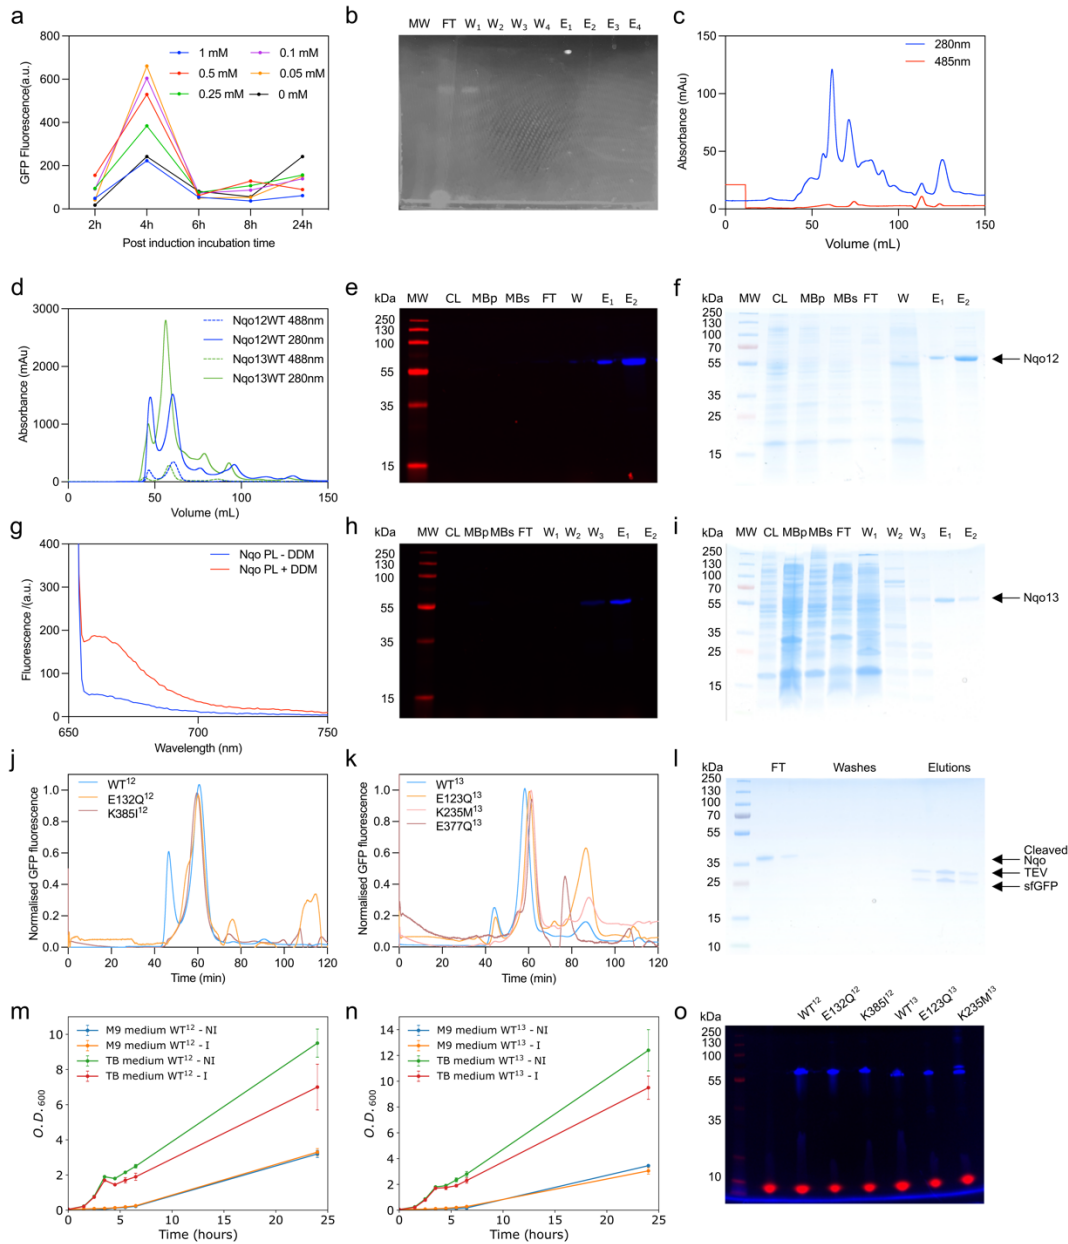

**Supplementary Figure 10 | Construct design, expression, purification, and stability of dissected antiporter-like modules.** **a**) Nqo12<sup>ATH</sup> expression trial using BL21 strain followed by GFP in-cell fluorescence. **b**) In-gel fluorescence of Nqo12<sup>ATH</sup>-sfGFP (without linker) monitoring IMAC fractions. **c**) Size-exclusion chromatography profile showing the absorbance at 280 nm and GFP excitation at 488 nm of Nqo12<sup>ATH</sup>-sfGFP without linker expressed in BL21. **d**) Size-exclusion chromatography profiles showing the absorbance at 280 nm and GFP excitation at 488 nm. **e**) In-gel fluorescence and **f**) Coomassie gel of Nqo12<sup>ATH</sup> following the purification fractions (CL: cell lysate, MBp: membranes pellet, MBs: membrane centrifugation supernatant, FT: flow through, W: wash, E<sub>1</sub>: IMAC elution, E<sub>2</sub>: SEC elution). **g**) Nqo orientation in liposomes measured using the NTA-Atto 647 N fluorescent label. **h**) In-gel fluorescence image and **i**) Coomassie gel of Nqo13 following the purification fractions (CL: cell lysate, MBp: membranes pellet, MBs: membrane centrifugation supernatant, FT: flow through, W<sub>1-2-3</sub>: washes, E<sub>1</sub>: IMAC elution, E<sub>2</sub>: SEC elution). SEC profiles for **j**) Nqo12 and **k**) Nqo13, eluted at 60 mL, showing GFP fluorescence followed at 488 nm. **l**) Gel showing sfGFP removal by overnight cleavage with TEV protease. Growth tests performed in TB and minimum medium (M9) for **m**) Nqo12 and **n**) Nqo13 in induced (I) and non-induced (NI) conditions. **o**) In-gel fluorescence assessing the reconstitution efficiency of the Nqos into proteoliposomes. Data are provided in the Source Data file.

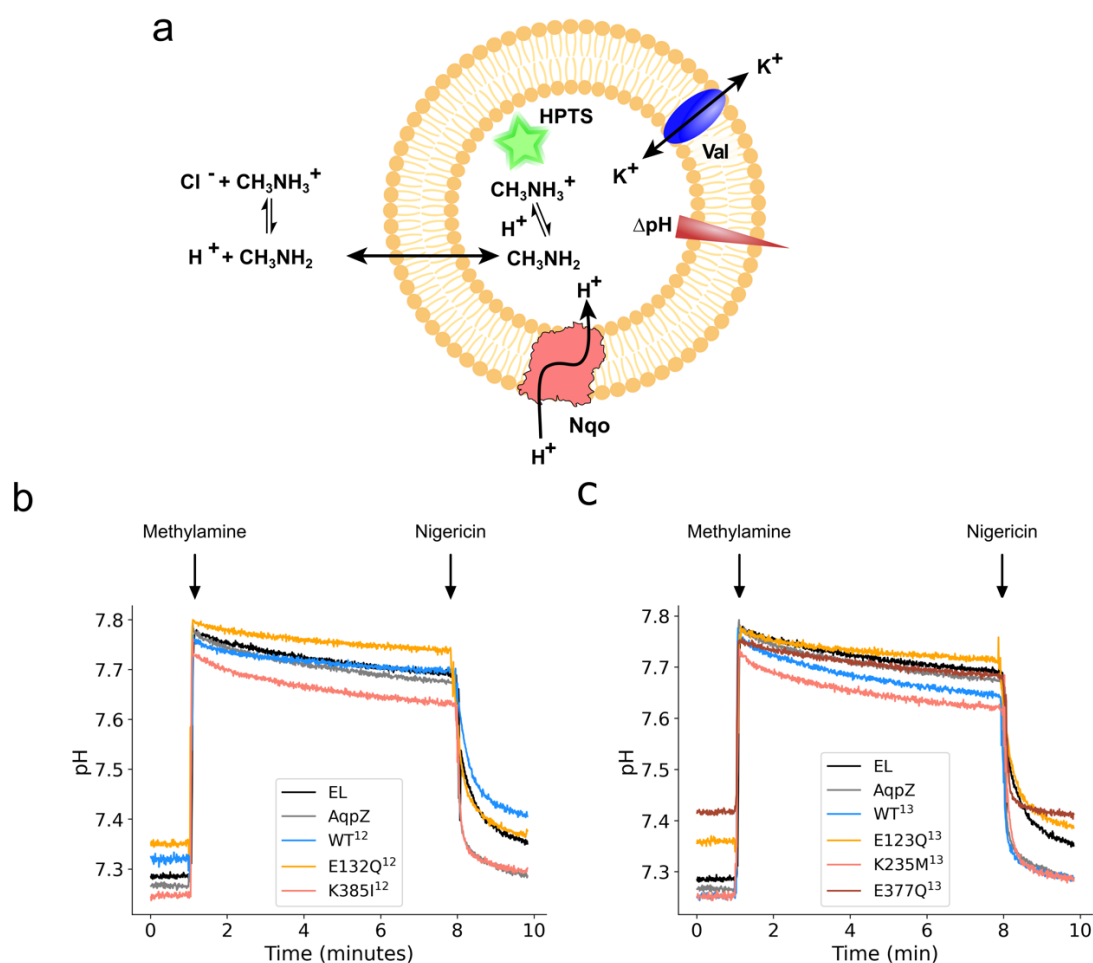

**Supplementary Figure 11 | Biophysical characterisation of proton conduction properties in dissected antiporter-like modules.** **a)** Proteoliposome assays for probing the proton conduction kinetics in the dissected antiporter-like subunits with pyranine (HPTS) by addition of  $\text{CH}_3\text{NH}_3^+\text{Cl}^-$ . Proton conduction in **b)** Nqo12 and **c)** Nqo13 proteoliposomes upon addition of 10 mM methylamine hydrochloride. Methylamine ( $\text{pK}_a=10.6$ ) addition leads to smaller kinetic differences between the constructs as compared to the acetate ( $\text{pK}_a=4.8$ ) assays, possibly due to the shifted equilibrium between the acid and base forms ( $[\text{acid}]/[\text{base}] = 10^{3.4}$  amine vs.  $10^{2.4}$  acetate at pH 7.2), secondary reactions between hydroxide ions and  $\text{CH}_3\text{NH}_3^+$ , and/or differences in membrane permeability of the weak acid/base ( $P_{\text{CH}_3\text{COOH}} = 6.9 \times 10^{-3} \text{ cm s}^{-1}$ ,  $P_{\text{CH}_3\text{NH}_2} = 9 \times 10^{-1} - 8 \times 10^{-2} \text{ cm s}^{-1}$ ). Data are provided in the Source Data file.



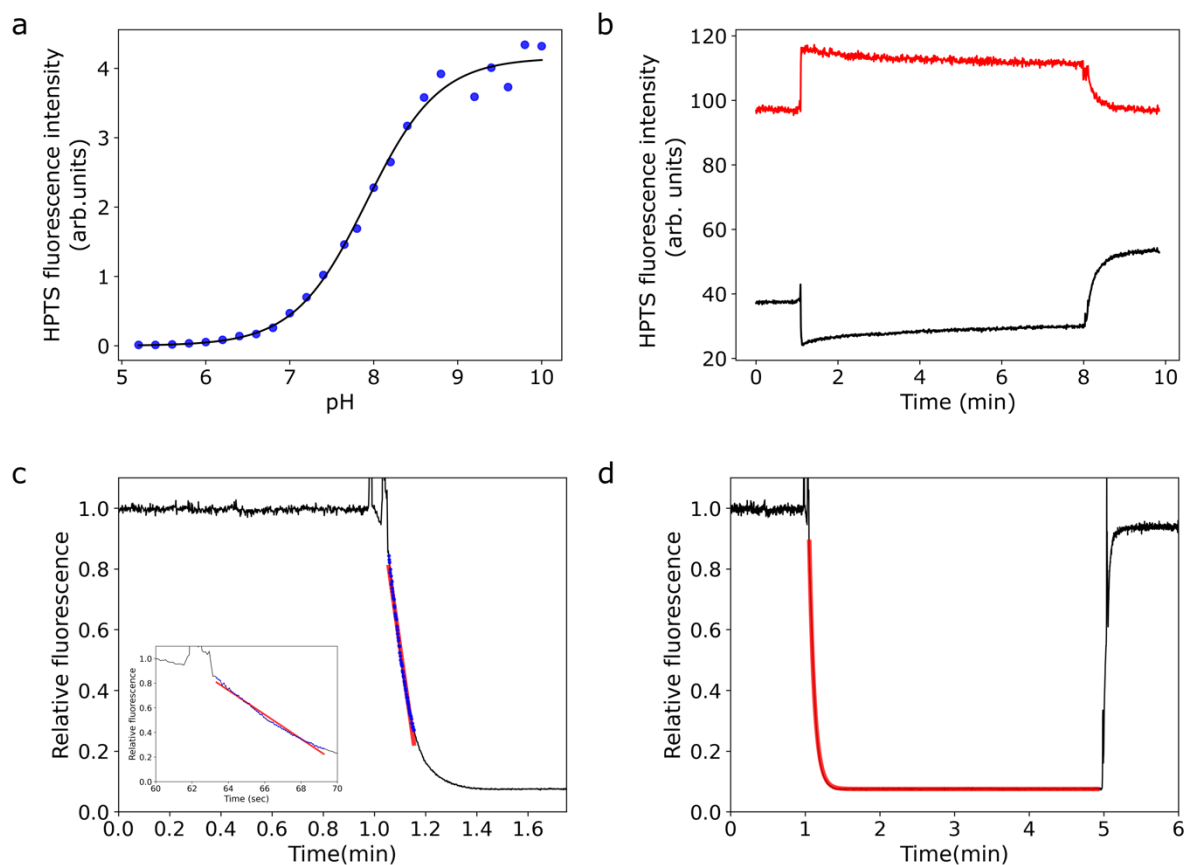

**Supplementary Figure 12 | Calibration of pyranine fluorescence and data fitting.** **a)** Pyranine calibration curve measured between pH 5 and 10. The higher measuring temperature (37°C) as well as the buffer conditions lead to an upshift in the pyranine  $pK_a$  from 7.2 (*cf. e.g. Ref<sup>15</sup>* for exploration of buffer effects). **b)** Raw data for pyranine fluorescence measurements following excitation at  $\lambda_{ex}=404$  nm (*red*) and  $\lambda_{ex}=454$  nm (*black*) and emission at  $\lambda_{em}=510$  nm. ATP synthase data fitted using **c)** a linear regression or **d)** an exponential fit. Data are provided in the Source Data file.

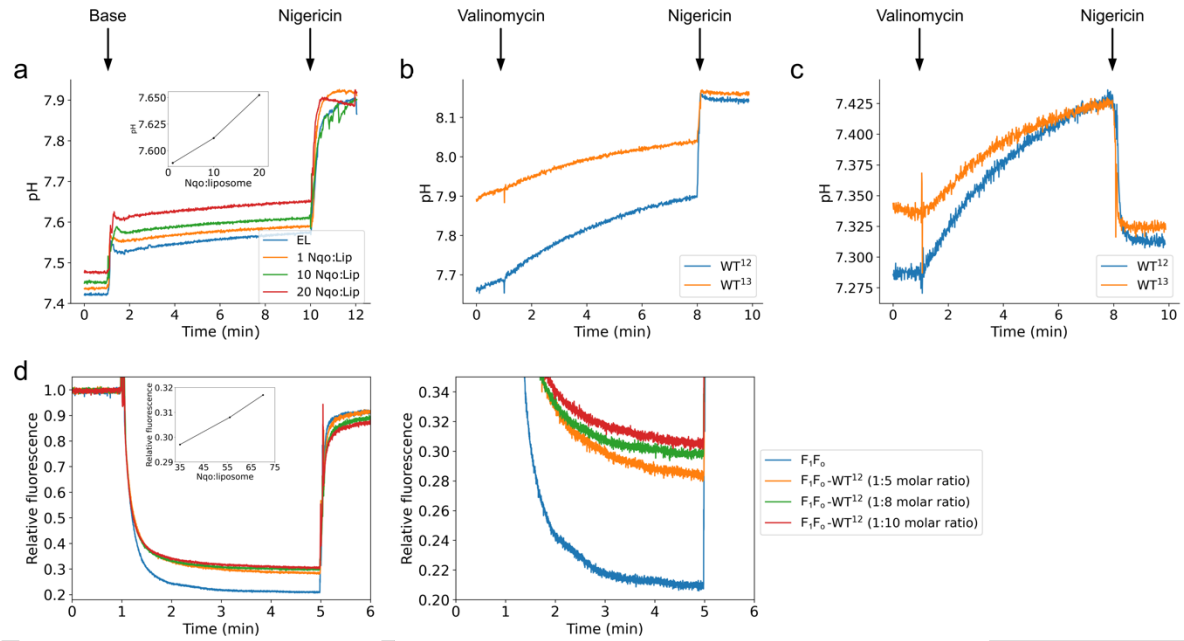

**Supplementary Figure 13 | Kinetic optimisation and characterisation of proton conduction in proteoliposomes.** **a)** Proton conduction monitored in the dissected antiporter-like subunits reconstituted in proteoliposomes with different Nqo-per-liposome ratio. The *pmf* was generated by addition of NaOH. *Inset*: linear relationship between the Nqo:liposome ratio and the resulting steady-state pH level upon addition of base. **b, c)** WT-Nqo12 and WT-Nqo13 mediated proton conduction induced by an external **b)**  $\Delta pH$ - or **c)**  $\Delta \Psi$ - gradient, followed by addition of valinomycin (at 1 min). **d) Left**: ACMA fluorescence quench upon addition of ATP with different Nqo:F<sub>1</sub>F<sub>0</sub> ratios. *Inset*: linear relationship between the Nqo:liposome ratio and the resulting steady-state pH level upon addition of ATP. *Right*: Closeup of the quenching levels. Data are provided in the Source Data file.

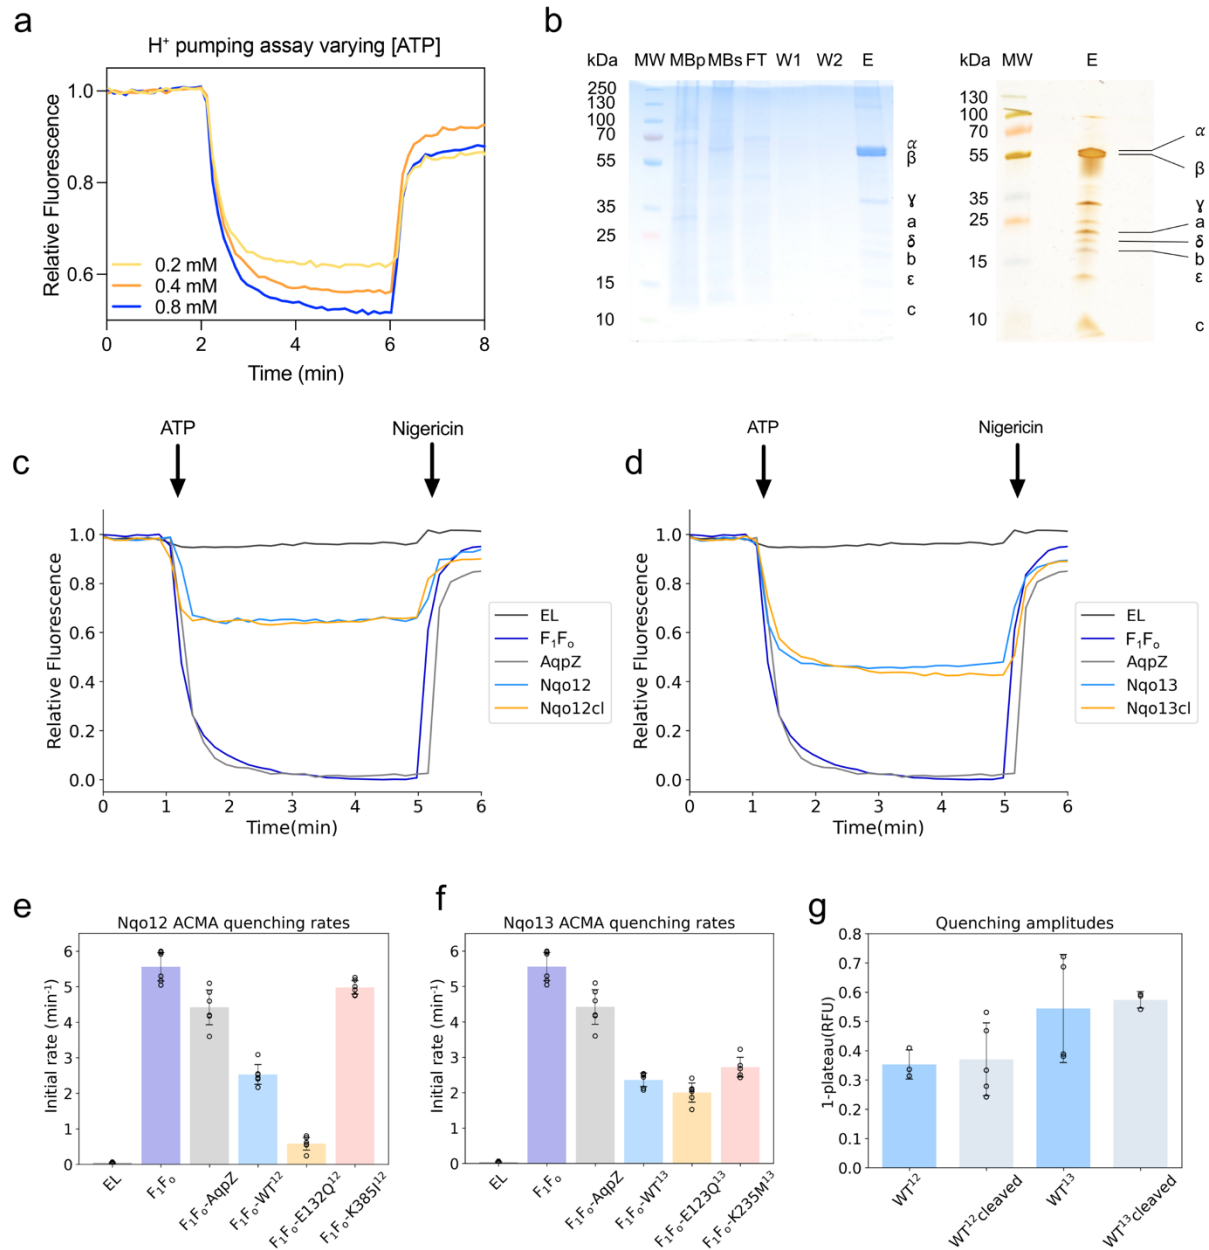

**Supplementary Figure 14 | Protonation dynamics in (proteo)liposomes reconstituted with ATP synthase. a)** Effect of ATP concentration on the ACMA fluorescence quenching. **b)** Coomassie gel of ATP synthase following the purification fractions (MBp: membranes pellet, MBs: membranes supernatant, FT: flow through, W1-2: washes, E: elution, and silver stained ATP synthase elution fraction. Proton conduction of **c)** Nqo12 and **d)** Nqo13 co-reconstituted with ATP synthase followed by ACMA fluorescence quenching. cl - sfGFP cleaved constructs. **e, f)** Fitted ACMA quenching rates from proteoliposome experiments with **e)** ATP synthase-Nqo12 and **f)** ATP synthase-Nqo13. Data shown are derived from independent experiments where  $n = 6$  (mean  $\pm$  SD) except F<sub>1</sub>F<sub>o</sub>-K235M<sup>13</sup> where  $n=5$ . **g)** Effect of cleaving sfGFP on the ACMA quenching for Nqo12 ( $n_{WT12}=4$ ,  $n_{WT12 \text{ cleaved}}=3$ ) and Nqo13 ( $n_{WT13}=3$ ,  $n_{WT13 \text{ cleaved}}=5$ ). Data are provided in the Source Data file.

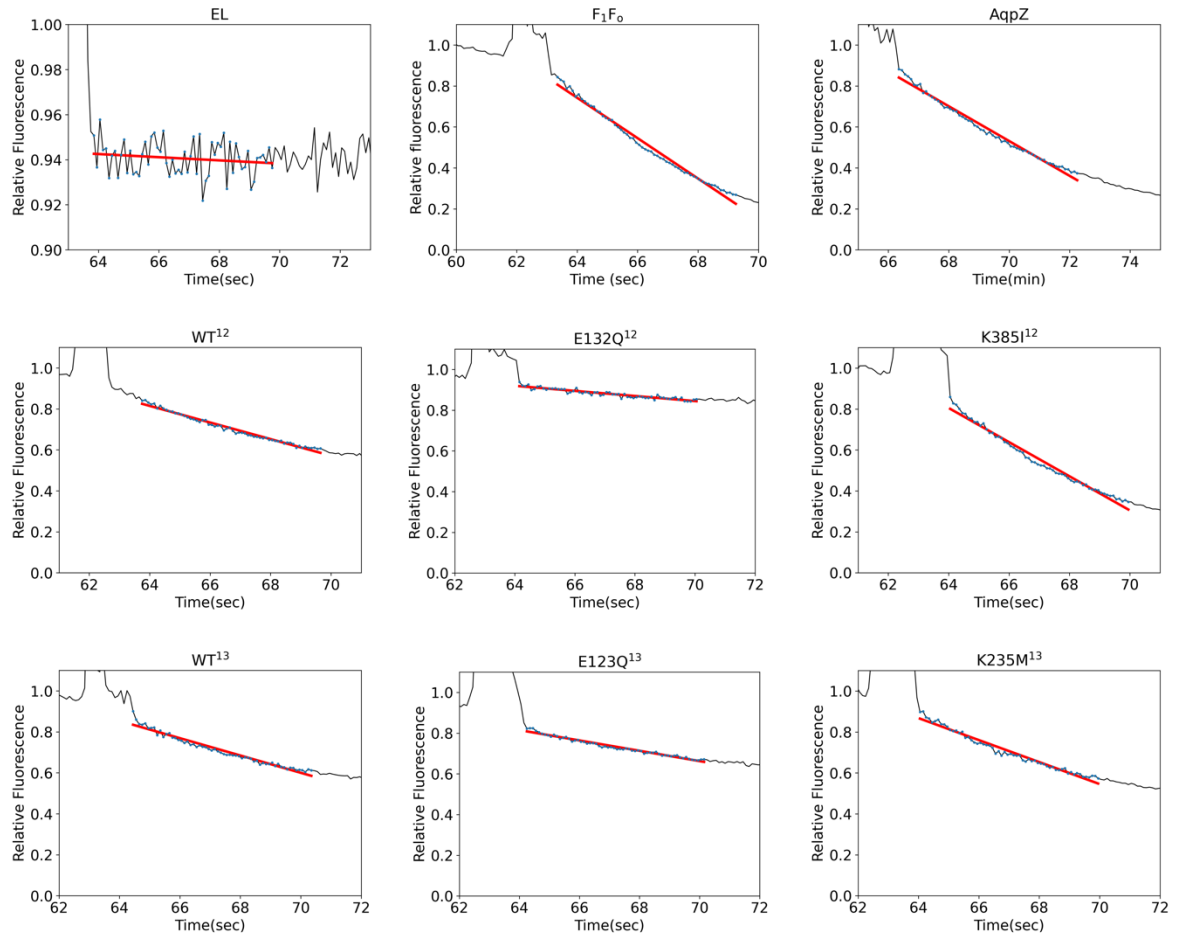

**Supplementary Figure 15 | Kinetic analysis of proton conduction in  $F_1F_0$ -Nqo proteoliposomes.** Proton conduction monitored in the dissected antiporter-like subunits reconstituted in proteoliposomes, with the *pmf* generated by addition of ATP with co-reconstituted ATP synthase using a linear regression fit. Data are provided in the Source Data file.



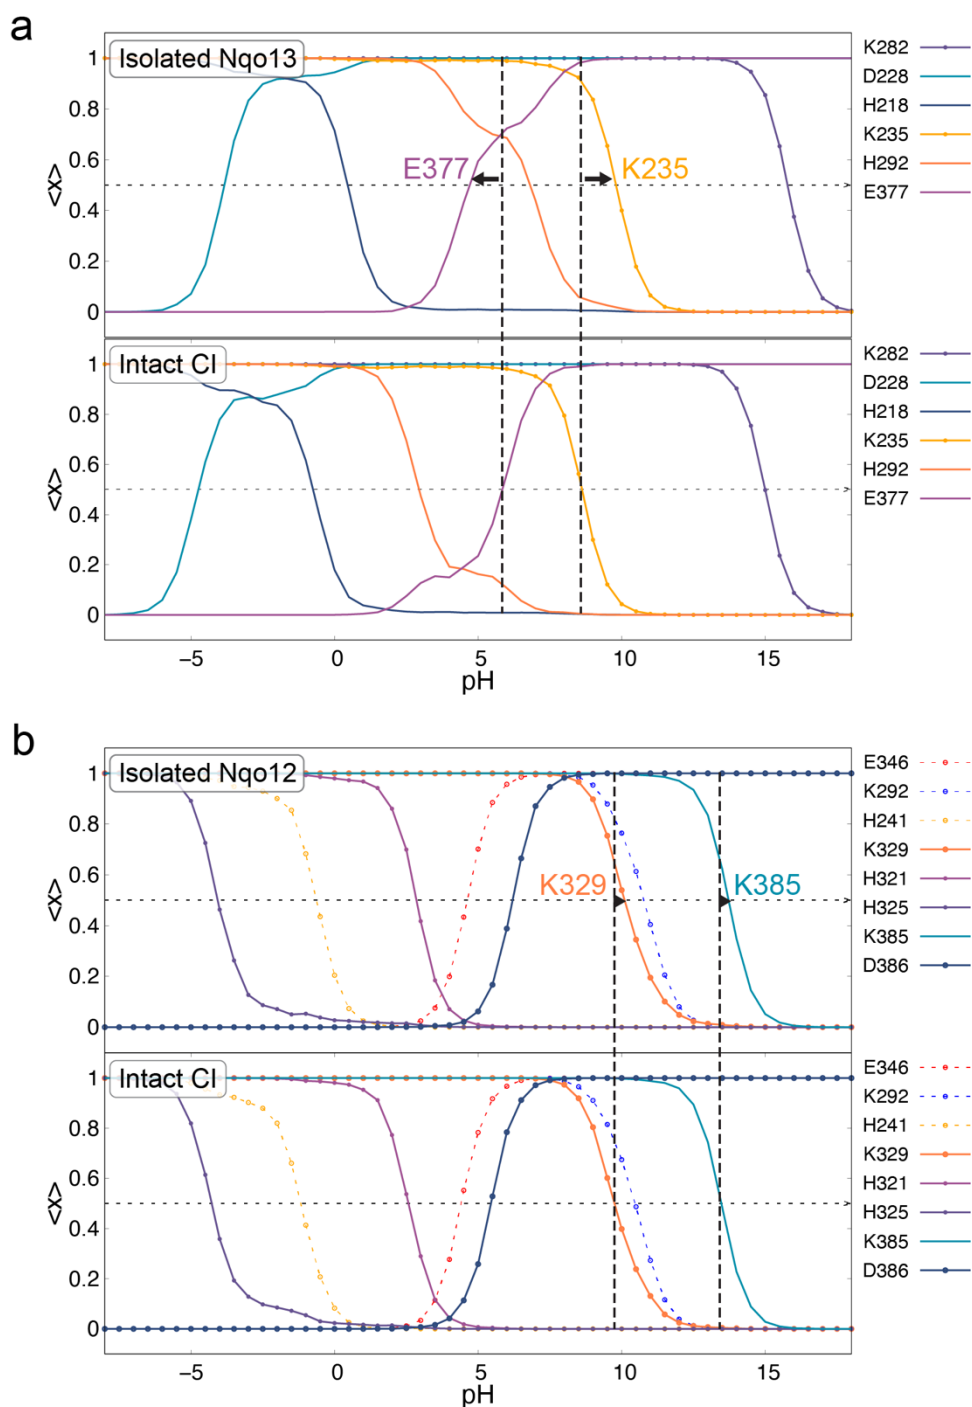

**Supplementary Figure 16 | Analysis of  $pK_a$  tuning effects in the dissected antiporter-like subunit and the intact Complex I.** The figure shows the protonation probability ( $\langle x \rangle$ ) as a function of pH. **a)** Titration curves of residues along the proton pathway for the isolated Nqo13 subunit (*top*), and Nqo13 within the intact Complex I (*bottom*), and **b)** the isolated Nqo12 subunit (*top*), and Nqo12 within the intact Complex I (*bottom*). Data are provided in the Source Data file.

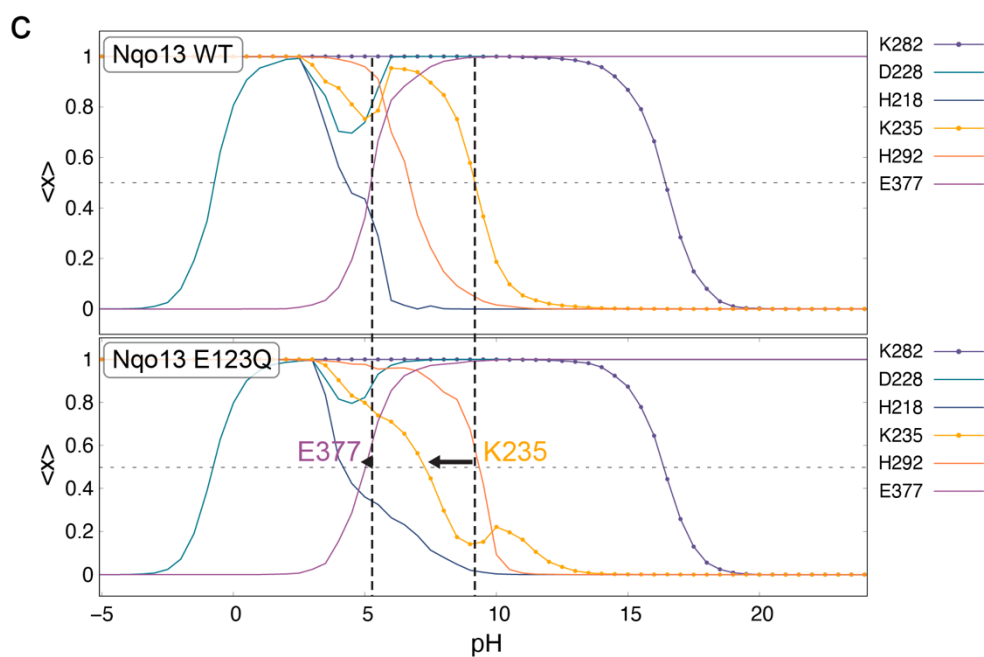

**Supplementary Figure 16 (contd.) | Analysis of  $pK_a$  tuning effects in the dissected antiporter-like subunit and the intact Complex I.** The figure shows the protonation probability ( $\langle x \rangle$ ) as a function of pH. **c)** Titration curves of residues along the proton pathway for the Nqo13 WT (*top*), and Nqo13 E123Q constructs, based on constant-pH MD simulations (see *Extended Methods*). Data are provided in the Source Data file.

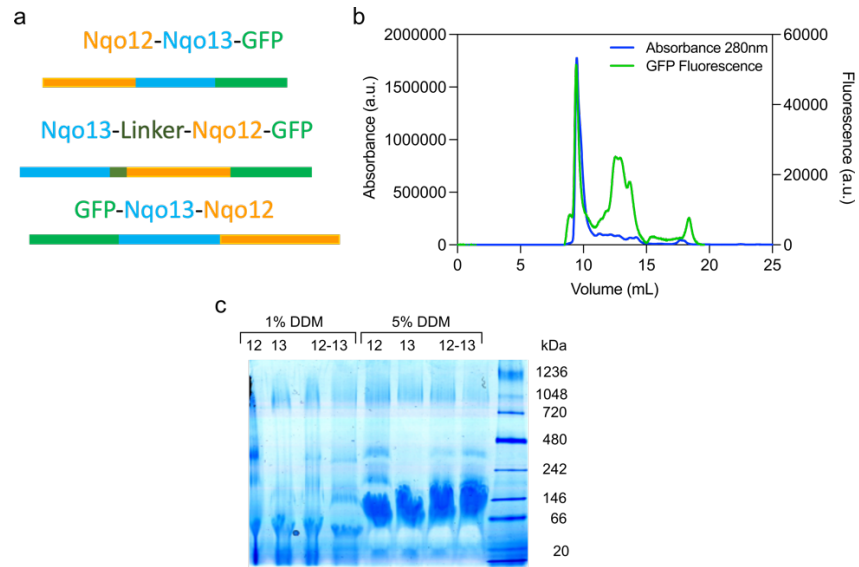

**Supplementary Figure 17 | Formation of a Nqo12-Nqo13 complex.** **a)** Design of an Nqo12-Nqo13 complex constructs. **b)** FSEC profile of truncated Nqo12 ( $\Delta$ A571-T583)-Nqo13-GFP complex membranes with the protein content followed at 280 nm (blue) and GFP fluorescence followed at 485 nm (green). **c)** Blue-native PAGE of Nqo12<sup>ATH</sup> and Nqo13 samples reconstituted separately and co-reconstituted in liposomes with *E. coli* polar lipids, followed by solubilisation in 1% or 5% DDM. The putative Nqo12<sup>ATH</sup>-13 complex was reconstituted using a protein to lipid ratio of 1:70 on the left and 1:140 on the right. Data are provided in the Source Data file.

*Nqo12/T. thermophilus*/1-606 1 ----MALLGT---ILLPLLGALLGLGKMRREPLPGVL---ASGLVL----ASFLLAGL----LSGGARFQA---EWL----PGIPFSLLDNLSGFLLIVTVGFLIHVYAI 92  
*Nuo1/E. coli*/1-613 1 ----MNMLALT---IILPLIGFVLLAFSRGRWSENVAIV---GVGSVGLAALVTFAGIVDFF----ANGEQTSYQPLWTMSVGDNIGFNLVLDGLSLTMLSVTVTGFLIHMYAS 184  
*Nqo12/P. denitrificans*/1-703 1 ----MEKVF---LFAPLIASLIALGWRRAIGKAQYL---TGTVLFLSCL----SWYFLFSDF---GVRPHIPLVDWVTVGDFHAEWAIRLDRLTAIMLIVTVTSALVHMYSL 99  
*NUSM/Y. lipolytica*/1-655 1 ----MYNAISL---IILPCISWLFPFGGRLGVYVTRM---TSTLIITITLI----TYYFYQLLGNNNPINLELFNLYINDYLDINYFIEDALITITMLAITITSSMVHIYSI 184  
*NDS/M. musculus*/1-607 1 ----MNIFTTSILLIFILLSPILISMSNLKIHNFPLYTTTISKFSFI----SLLPLMHFFNNMEYMITTHWVMTMSMELKMSFKTDFSSILFTSVLFWTWSIMQFSS 185  
*NDS/O. aries*/1-606 1 ----MNLFSLSLTVLITLLTPIIAINFNTKFNTPNPLYKVTITSCAFIT---SMIPTMHFIHTGQEMIISNWHHLTIQTLKLSFKMDFDSMHFVPVLFVWTSIMEFSM 185  
*NDS/B. taurus*/1-606 1 ----MMHFSLSLTVLITLLTPIIMMSFNTPKSNPNLYKVTIAISYAFIT---SMIPTMHFIHSGQELIISNWHHLTIQTLKLSFKMDFDSMHFVPVLFVWTSIMEFSM 185  
*NDS/H. sapiens*/1-603 1 ----MTHTMTHTLTLTSLIPITLTVNPKNKSYPHYKSVIVASTFI---SLFPTTHMFLCQDEVIISNWHATTQTQLSLFKMDFDSMHFVPVLFVWTSIMEFSM 185  
*NDS/A. thaliana*/1-669 1 ----HYLLI---VFLPLLGSVAGFGFRFLGSEGAIM---TTTCVSFSSIL----SLIAFYEVALGASACYLRIAPWISSEMFSDASGFLFDLSLTVMLIVTSSISLVLHYSI 181  
*NdhF1/T. vestitus*/1-656 1 MEPLYQYAWLI---PVLPLLGLVIGFGLIAFSETTSKLR---RPSAIFIMALMAIAMGHSLTFLWSVQV---GHLPYTQMIENAAAGNLHIAMGVVIDPLAALMLVITVTVAFLVMLYSD 112

*Nqo12/T. thermophilus*/1-606 93 GVMGSDP-----GYSRFAYFNLFIAMMLTIVLADSVPMVFIHNEGVGLAFLLLIGFMYKNPYQVADARKAFVNNRIGDLGFMLHAILWALYGTLSISELKEAMEGLK----- 197  
*Nuo1/E. coli*/1-613 105 WMRGEE-----GYSRFAYFNLFIASHVVLVADNLLMLYHMGVGLCSYLLIGFYTPDKNGAAMKAFVVTIVGDFLAFALFILYNELGTFLNFMVELAPAHFAD----- 210  
*Nqo12/P. denitrificans*/1-703 100 GMAHDNDNTHDEHYKARFAYLSFTFAFMLMLVADNLLQMFHMGVGVQVASYLLIGFYKKASANAAMKAFVNNRVGDFGLLLIFGFIYMLTGSVQDFEIRFQPQLAQTEIDFL 217  
*NUSM/Y. lipolytica*/1-655 105 GMETDP-----HQVRFSSLSMFTFMIIITVGSNVFVLVGVMEFIVGTSYLLISFWVTRLQAMKASLAVLMNRFGDAFFVYGLCVIAYVFTLNYSYTFATAYLIN-T----- 209  
*NDS/M. musculus*/1-607 106 WMHSDP-----NINRFIKYLLFLITMLIITSANMFOLFIEGVGIMFLLIGMWYGRTDANTAAQALTYNRIIGDIGFILAMVWFLSNMNSWELQIM-----FS 204  
*NDS/O. aries*/1-606 106 WMHSDP-----NINQFFKYLFLITMLIIVTANNLFOLFIEGVGIMFLLIGMWYGRTDANTAAQALTYNRIIGDIGFILAMWFLNLNTWDLQIF-----ML 204  
*NDS/B. taurus*/1-606 106 WMHSDP-----NINQFFKYLFLITMLIIVTANNLFOLFIEGVGIMFLLIGMWYGRADANTAAQALTYNRIIGDIGFILAMWFLNLNTWDLQIF-----ML 204  
*NDS/H. sapiens*/1-603 106 WMHSDP-----NINQFFKYLFLITMLIIVTANNLFOLFIEGVGIMFLLISWYARADANTAAQALTYNRIIGDIGFILALAWFILHNSWDPOQMA-----LL 204  
*NDS/A. thaliana*/1-669 102 SMSEDP-----HSPRFMCYLSITFTFFMLMLVTDGNPLQLFIEGVGLASYLLIHFVTRLOQADKAIAKMLVNRVDFGLALGILGCTFLQTVDFTIFACASVPR---NSWIFC 211  
*NdhF1/T. vestitus*/1-656 113 GMAHDP-----GYVRFAYLSLGGSSLLGVVSPNLVQVYVFWELVGMCSYLLIGFYDRKSAEAAKQAFVTRNRVDFGLLLMGVLFWATGTFDFAGMGDRLTTELVTGL--- 220

*Nqo12/T. thermophilus*/1-606 198 --NPDLLALAGLLFLFVAGVSAQIPIMVWLPDAMAGTPVSAIHAAHMTAGVYLIASSFLYSVLPDVSYAIAVVGLLIAYGALSAGFQTDIKKIVAYSTISQLGYFLAAGVG 313  
*Nuo1/E. coli*/1-613 211 --GNMMLMWATMLLGGVAGVSAQLPQLTADAMAGTPVSAIHAAHMTAGVYLIAHGLFLMTPVELHVGIVGAVLLIAGFAALVQTDIKRVLAYSTISQIGYFLALGVQ 326  
*Nqo12/P. denitrificans*/1-703 218 WRDWAANLLGLFLFVAGVSAQLLHTWLPDAMEGTPVSAIHAAHMTAGVFLVCMSPLEYFADAKNFVIVIGATIAFFAATVGLVQNDIKRVIAYSTISQLGYFVAAVG 335  
*NUSM/Y. lipolytica*/1-655 210 ----DLVLIMLALFIAMASQFGLHNWLPDAMEGTPVSAIHAAHMTAGVYLIAHGLFLMTPVELHVGIVGAVLLIAGFAALVQTDIKRVLAYSTISQIGYFLALGVQ 326  
*NDS/M. musculus*/1-607 205 NNNDNLPLMG--LIIAATGSAQFGLHPWLPDAMEGTPVSAIHAAHMTAGVFLVCMSPLEYFADAKNFVIVIGATIAFFAATVGLVQNDIKRVIAYSTISQIGYFLALGVQ 326  
*NDS/O. aries*/1-606 205 NPNDNLPLMG--LIIAATGSAQFGLHPWLPDAMEGTPVSAIHAAHMTAGVFLVCMSPLEYFADAKNFVIVIGATIAFFAATVGLVQNDIKRVIAYSTISQIGYFLALGVQ 326  
*NDS/B. taurus*/1-606 205 NPNDNLPLMG--LIIAATGSAQFGLHPWLPDAMEGTPVSAIHAAHMTAGVFLVCMSPLEYFADAKNFVIVIGATIAFFAATVGLVQNDIKRVIAYSTISQIGYFLALGVQ 326  
*NDS/H. sapiens*/1-603 205 NPNDNLPLMG--LIIAATGSAQFGLHPWLPDAMEGTPVSAIHAAHMTAGVFLVCMSPLEYFADAKNFVIVIGATIAFFAATVGLVQNDIKRVIAYSTISQIGYFLALGVQ 326  
*NDS/A. thaliana*/1-669 212 NMRLNALSILCILFIAGVSAQIGLHTWLPDAMEGTPVSAIHAAHMTAGVFLVCMSPLEYFADAKNFVIVIGATIAFFAATVGLVQNDIKRVIAYSTISQIGYFLALGVQ 327  
*NdhF1/T. vestitus*/1-656 221 -LSPSLAAILAIVLFLPVASQFPLHVLPDAMEGTPVSAIHAAHMTAGVFLVCMSPLEYFADAKNFVIVIGATIAFFAATVGLVQNDIKRVIAYSTISQIGYFLALGVQ 327

*Nqo12/T. thermophilus*/1-606 314 AYWVALFVFTFAFFKALLFLASGVVIALG--GEIDVRKMGGWKHLQTRWHALIGALALGGL-----PLL-SGFWSKDAIJAATLTYPFGGVGYVAGLVAVLAM 415  
*Nuo1/E. coli*/1-613 327 AWDAAFILMTFAFFKALLFLASGVVIALG--HEINIFKMGGKRKSIPLVLYLCLVGGAAALSAL-----PLVTAGFFSKDEILAGAMA---NGHINLMVAGLVGAFM 427  
*Nqo12/P. denitrificans*/1-703 336 YSAAAMFLLTHAFFKALLFLAGSVVIAHAM-----HEIDMRNYGGLRKKIPLTFWAMHITFATITVGIPLTHLGF-AGFLSKDAIIESAYG---SGYAFNVLIAACF 440  
*NUSM/Y. lipolytica*/1-655 324 ANYLALFHLGHFAFFKALLFMSAGVIHISLN-----ESIDIRTYGGLLSYLPYTYICITIASLSHAM-----PGL-TGYTYKDIIESYGYISYISNVVYIAYL 421  
*NDS/M. musculus*/1-607 321 QPHLAFILHCTFAFFKALLFMSAGVIHISLN-----DEIDRKMGGELKIMPTSSCLVIBSLALITM-----PFL-TGFYSKDLIEASINTNT---NAWALLITL 421  
*NDS/O. aries*/1-606 321 QPHLAFILHCTFAFFKALLFMSAGVIHISLN-----DEIDRKMGGELKIMPTSSCLVIBSLALITM-----PFL-TGFYSKDLIEASINTNT---NAWALLITL 421  
*NDS/B. taurus*/1-606 321 QPHLAFILHCTFAFFKALLFMSAGVIHISLN-----DEIDRKMGGELKIMPTSSCLVIBSLALITM-----PFL-TGFYSKDLIEASINTNT---NAWALLITL 421  
*NDS/H. sapiens*/1-603 321 QPHLAFILHCTFAFFKALLFMSAGVIHISLN-----DEIDRKMGGELKIMPTSSCLVIBSLALITM-----PFL-TGFYSKDLIEASINTNT---NAWALLITL 421  
*NDS/A. thaliana*/1-669 330 NYSVSVFLMNHFAFFKALLFLASGVVIAHMS-----DEIDRKMGGELASSPFLTYAMHLIGSLILIGF-----PFL-TGFYSKDLIEATYKTIISGNFAFMGLSVSL 432  
*NdhF1/T. vestitus*/1-656 338 ASYAGFLHMTFAFFKALLFLGSGGVVHMEGVGNPDLAIDMRNYGGLRKYMITGATFLVGLCLATSGV-----PPF-AGFWSKDEILGAVFHA---NPAWLLTLWTAGL 444

*Nqo12/T. thermophilus*/1-606 416 AMRMWFLVFLGEERGH-----HHPEAPPVNMWPNHNLALGSLAGVLAIPHLPNVLPEFLKPALAE-----VEA 482  
*Nuo1/E. coli*/1-613 428 YFRMIFIVFHGKEQIH-----AHAKVGVTHSLPLVLITL-STFVGLALVLP-PLQGVLPQTTEL-----GFDWLDYKVFVKPFLGIAWLL-----KRDPLNSMMN 570  
*Nqo12/P. denitrificans*/1-703 441 YSMRLIFLTFYKGKRGD-----HDHAHESPVMPTIPLGVLAIGAVFAGHMVYG-PFGDGHKVTYFYHIAGAHHEAAEGEEAEHATAEAPVEHAVADTATAEAEAAEA 588  
*NUSM/Y. lipolytica*/1-655 428 YSMKILYLTFTYSNPNNN-----TIT-----YNAHESNYITLPMFLIAIFAMFAGILKD-IYLGVTGDT-----YHPSNFAKFSSTLLGYYPITMHRAPYMNLSMSQKSASSL 563  
*NDS/M. musculus*/1-607 422 YSMRIYFVMTKPRFPP-----LISINENDPLMNPVKRALFSGIFAGFVSYNIPTSPITVLT-----FNYPSNTFKFSNLLGYYPITMHRAPYMNLSMSQKSASSL 563  
*NDS/O. aries*/1-606 422 YSTRIIFALLGQPRFPT-----LNIINENNPLINSIKRLIGSLFAGFIIISNNIPPTIPQMT-----FNYPSNTFKFSNLLGYYPITMHRAPYMNLSMSQKSASSL 563  
*NDS/B. taurus*/1-606 422 YSTRIIFALLGQPRFPT-----LNIINENNPLINSIKRLIGSLFAGFIIISNNIPPTIPQMT-----FNYPSNTFKFSNLLGYYPITMHRAPYMNLSMSQKSASSL 563  
*NDS/H. sapiens*/1-603 422 YSTRMILLTLTGQPRFPT-----LTNIINENNPLLNIPKRALGSLFAGFIIITNNISPASFPQT-----FNYPSNTFKFSNLLGYYPITMHRAPYMNLSMSQKSASSL 563  
*NDS/A. thaliana*/1-669 433 YSFRLLFLTLVPTNSF-----GRD-----ISRCHDAPIPMAIPLILALGSLFVGYLAKD-MMIGLGTNF-----AKAIQPLQFSLHKWYFDELVEAVFKGRCRLARQVE---VDYNNVGDVGN 614  
*NdhF1/T. vestitus*/1-656 445 YMFYMYMTFEGKFRNVPPERQEHDDHSHHAAPHPESPTWMTPLVLVLAIPSTLIGVGTPT-F-NN---LFEVFIHAPGEEK-----VA----- 524

*Nqo12/T. thermophilus*/1-606 483 HHLSLGAEWGLIA-----LSAAVALLGLWAGVF-----FFQ-----RKV-FPA-WYLAFAEASREAFVDRAYNALIVNPLKALAEALFY---GDRGLLSGYFG 566  
*Nuo1/E. coli*/1-613 489 SMLTEITSGVVA-----VUGILLAAWLGLKR-----TLVTSI-ANSAPGR-LGTWYNAW-----GFDWLDYKVFVKPFLGIAWLL-----KRDPLNSMMN 570  
*Nqo12/P. denitrificans*/1-703 447 EHAEIAAPVGGAIYHMPDNHIM-DEAHAPAWV---KVSPPVAMVLGLITAWTFYIANPSLPRL---AAHEPALYRFLLNKMYDFEIEYFIVRPKAWGL-RVLKMGDGDVADGTIN 657  
*NUSM/Y. lipolytica*/1-655 448 -----VGTHI---LPNNFSYFDEFTSITQFY---KLPLISAILVSLIVVL---NEFFAIVFNLNKKYINTVYSIFNQKLVSDQLNHIIIFKGLVTSGN-IAHVDVKGSLVRL 589  
*NDS/M. musculus*/1-607 482 -----MP---WFLKMTALITVILGFLIALELNNLTMLKS---MNKANPYSFSTLLGFFSPITMHRAPYMNLSMSQKSASSL 563  
*NDS/O. aries*/1-606 482 -----MP---HYLKMTALITVILGFLIALEISNTHTYK---FNYPSNTFKFSNLLGYYPITMHRAPYMNLSMSQKSASSL 563  
*NDS/B. taurus*/1-606 482 -----IP---LYLKALAVTFLGLLTALDNLNLTMLK---MKSPLCTFYFSNHLGFYPSITHTRTIPYGLGLTSQNLPLLLDLTLWEKLLP 563  
*NDS/H. sapiens*/1-603 493 -----WANSLLVLPKNEILAESEFAPTII---KLPIPLFSTLGAFAVYVNVNVDQFRAF-QTSTFCNRLYSFFNKRWFDDQLVNDPLVRSFLRGYVFEALDKGAEIILGP 599  
*NdhF1/T. vestitus*/1-656 525 -----EHAVDLTEFLILGSSVGLMGITVVAALMYLKGITPSPQAT---AKAIQPLQFSLHKWYFDELVEAVFKGRCRLARQVE---VDYNNVGDVGN 614

*Nqo12/T. thermophilus*/1-606 567 L---GGAARSLGGQLARLQTYGLRYVALFVLGALLGLVMRW----- 606  
*Nuo1/E. coli*/1-613 571 I---PAVLSRFAGKGLLSSENGYLRWYVASHMIGAVVLLALMLVR----- 613  
*Nqo12/P. denitrificans*/1-703 658 GVAMGLIP-RLTRAARVQSGYLFHYAFAMVLGIVGLITWMMRGH----- 703  
*NUSM/Y. lipolytica*/1-655 590 VGINRLLN-KASYNVINLSNTRSSLSNMSMLITITVLSLLL-----VLVMNVNFIIVIPVLSILYILFS-- 655  
*NDS/M. musculus*/1-607 564 KSTSTLH--TNMTTLTNOKGLIKLYFMSFILINILITILYSINLE----- 607  
*NDS/O. aries*/1-606 564 KTISLAQ--MKMSTTITSOKGLIKLYFSLITILISTLLNFHE----- 606  
*NDS/B. taurus*/1-606 564 KTISLAQ--MKASTLVNOKGLIKLYFSLITILISTMLNFHE----- 606  
*NDS/H. sapiens*/1-603 564 KTISQHQ--ISTSIITSTQKGMILKLYFSFFPLTLITLIT----- 603  
*NDS/A. thaliana*/1-669 600 YGISYTFR-RLAERISQLOSGFYHYAFAMLLGLTLVTFCCMDSLSLWMDNRLSFLILI---VSSFYTKSSQE 669  
*NdhF1/T. vestitus*/1-656 615 LT---GFTVMVTGEGIKYLNQGRAQFYALVILAVLGFVIFSQT----- 656

**Supplementary Figure 18 | Sequence conservation in Nqo12 and Nqo13.** Multiple sequence alignment (MSA) of Nqo12 and Nqo13 from different species. The MSA was performed with ClustalΩ.<sup>16</sup> Residues with up to 50% sequence conservation are coloured by the ClustalX colouring scheme.



*Nqo13/T. thermophilus/1-469* 1 -----MVLAVLLPVVFGAL-----L LLLGLPRALGVLGAGLSFLLNLYLFLTHPGG-----VAHAFQAPLLPG-----AGVYWAFGLGSLALFFLTIALTV 82  
*NuoM/E. coli/1-509* 1 -----MLL PWLILTPFGGFLC-----WQTERFGVKYPRWIALITMGLTLALSLQLWQGGYSLTQSAQIPQWQSEFDMPIWR-----FGISYTHLADGLSLMLVVL TGLLG 98  
*Nqo13/P. denitrificans/1-513* 1 -----MTNLLSIITFLPIVAAI1-MALFLRGQDEAAARNAKWALLTTTATFVLSFLVLRFDPA-----NTGQFQVEDHA--WIM-----GVCYKMGVDGSLVFLVLTTFMM 96  
*Nu4M/Y. lipolytica/1-486* 1 -----MFLTSILLSSLYLFNRLLAWQGNVHKFYLFASNL LLLFVVLVYNFTNF-----SNSFQNFELFNSLNPFGLSNSDISNGLLFGDGLSLFTILLTVLLI 96  
*ND4/M. musculus/1-459* 1 -----MLKII LPSLM-----LLPLTWLSSPKKTWNTVTSYSFLSLSLSTLLWQ-----TDENYKNFSNMFFSDSLSTPLIILTAWLL 73  
*ND4/O. aries/1-459* 1 -----MLKYI IPTMM-----LMPLTWLSKNMNIWNTHTSLSLSLSTLLNQ-----FGDNLNFSLLFFSDSLSTPLIILTAWLL 73  
*ND4/B. taurus/1-459* 1 -----MLKYI IPTMM-----LMPLTWLSKNMNIWNTHTSLSLSLSTLLNQ-----FGDNLNFSLLFFSDSLSTPLIILTAWLL 73  
*ND4/H. sapiens/1-459* 1 -----MLKLIVPTIM-----LLPLTWLSKNMNIWNTHTSLSLSLSTLLNQ-----INNLFSCSPTFSSDPLSTPLIILTAWLL 73  
*ND4/A. thaliana/1-495* 1 MLEHFCECYFNL-SGLILCPVLGSII-L-LFIP---NSRIRLIRLIGLCASLITFLYSVLVLIQFDS--TAKFQFVESLR--WLPY-----ENINFLYGLDGLSLFVLTITFLI 101  
*NdhD1/T. vestitus/1-529* 1 -----MSTFPWLTTIILFPVIAALAI--PFI-PDPTGKGRIRWALAVGLIDFALIVYAFNTFYD---LNTPGHQLWESYD--WIPF-----IGLRWSVGADGLSMLPILITLGTIF 99

*Nqo13/T. thermophilus/1-469* 83 L G A L V A-----RVEGRFLGLALLMGLLGLFAARDLVYVVFPAALIPALLMLYLGGEGR-----TRALYTFVFLYLVGSLPMLAAVLGARLLSGSPPTFL-----E--- 178  
*NuoM/E. coli/1-509* 99 VLAVLCSWKEI-----EKYQGFHNLMLLGVIGVFLADIMFLFFFMMVPMYFLLIALGHKASDGKTRITAAATKFFIYQASGLVNLIAIALVVFVHYNAT--GWTFMYE--- 208  
*Nqo13/P. denitrificans/1-513* 97 P T I L S T W Q V Q---DKVKEYNIAFLVLEGLMIGVFTALDVLVLYFPEAGLIPMLFIIGWGGKDR---IYASFKFFLYFLGSLVNLVAMIAMYRMAGTIDPTILLTFDFPSEN 205  
*Nu4M/Y. lipolytica/1-486* 97 P T I L L G N W Y N I---NFSNLYYTLVLAIGLVILLNFHALDYISFYLFPEATLPLFLIHLIHYGSSDS-----ERASFYVLMFLSGSLFMLLSIVVISVLNNTNF-----INHN 198  
*ND4/M. musculus/1-459* 74 P L M L M A S Q N H L K K N N V L Q K Y T S M L S L Q I L L M T F S A T E L I M F Y I L F E A T I P T L I I T R W G N Q T E-----RLNAGIYFLFYLTIGSTPLIALILIQNHVGTNLNMLSFTHT--- 185  
*ND4/O. aries/1-459* 74 P L M L M A S Q N H L K K N L A R K K L F T S M L I L L Q L F L M T F T A T E L I F F Y I M F E A T I P T L I I T R W G N Q T E-----RLNAGIYFLFYLTIGSTPLIALILIQNHVGTNLNMLSFTHT--- 185  
*ND4/B. taurus/1-459* 74 P L M L M A S Q N H L K K N L A R K K L F T S M L I L L Q L F L M T F T A T E L I F F Y I M F E A T I P T L I I T R W G N Q T E-----RLNAGIYFLFYLTIGSTPLIALILIQNHVGTNLNMLSFTHT--- 185  
*ND4/H. sapiens/1-459* 74 P L T I M A S Q R H L S E P L S R K K L Y L S M L I S L Q I S L M T F T A T E L I M F Y I F F T T L I P T L A I T R W G N Q P E-----RLNAGIYFLFYLTIGSTPLIALILYTHNTLGLSNIILLTLTAQE--- 215  
*ND4/A. thaliana/1-495* 102 P T C I L V G W S G M---RSYGKEYTIAFLICEFLMAVEFCLDILLFYVFPSPVLPMPFIIGVWGSQRQ---KIKAAQYFFLYLTIGSTPLIALILIFQTGTIDLOIILLTFEFS--- 210  
*NdhD1/T. vestitus/1-529* 100 T L I A L A W P V T---L-KPRLFYFLMLAMYGQIAYEAVQDMLVYFLAWLELIPVYLLIANGGHKR-----QYATKFIYLTIGSTPLIALILVAGLAMAFYGDVTSFDM-----Q--- 199

*Nqo13/T. thermophilus/1-469* 179 -DLLAHLPEEEAAVWFVLFALFAFAITPLFLHAWLPPOQHNPSPGLADALSTLYVGVFAFFFAIPLAPEGFAQAQGLLFLAALSALYGAWWFAAKDFTLTLAGLSHMGVA 296  
*NuoM/E. coli/1-509* 209 -ELLNTPMSSGVEYLLMLGFFIAFAVMPVPLHGWLPDAHSQAPTAGSDVLGAILLTAAYGLLRFSLPLFPNASAEFAPIAMWLGVIGIFYGAWMAFAQTDINRLIATSVSHMGV 326  
*Nqo13/P. denitrificans/1-513* 206 FRLLGMTVGGQMQLFLFAFFASFAVMPMPVHTWLDPAHQAPTAGSVLLAAVLHGGYGLRFLSLPMFPVASGVAQPYVFWLSAIAIVYTSLVALAQSDMKVIAIASSVAHMGV 324  
*Nu4M/Y. lipolytica/1-486* 199 LFLVS---LDLQTIWLGLFAIMVKTPLFFIHWLVVHVSSEPLAGSMILAGLLALAYAILRLLPLLCEAQLYTPMIYIISLLTIILSLATLRQDLKVIATSSISHMGIA 313  
*ND4/M. musculus/1-459* 186 -----LDASWSNLLWLACMMAFLIMPLYGVHLWLKPAHVEAPIAGSMILAAILLKGGYGMIRISIIIDPLTKYMAYPFII-LSLWGMIMTSSICLRQTDLSLIAVSSVSHMALV 297  
*ND4/O. aries/1-459* 186 -----MPNSWSNTPMMLACMMAFMVMKMPLYGLHLWLKPAHVEAPIAGSMVLAAILKGGYGMIRITILLNPIITDFMAYPFIM-LSLWGMIMTSSICLRQTDLSLIAVSSVSHMALV 297  
*ND4/B. taurus/1-459* 186 -----VHNSWSNVFMMACMMAFMVMKMPLYGLHLWLKPAHVEAPIAGSMVLAAILKGGYGMIRITILLNPIITDFMAYPFIM-LSLWGMIMTSSICLRQTDLSLIAVSSVSHMALV 297  
*ND4/H. sapiens/1-459* 186 -----LSNSWANNLMLAYTAFMVMKMPLYGLHLWLKPAHVEAPIAGSMVLAAILKGGYGMIRITILLNPLTKHMAYPFLV-LSLWGMIMTSSICLRQTDLSLIAVSSVSHMALV 297  
*ND4/A. thaliana/1-495* 211 -----RRQIFLWIAFFASFAVMPVHVIWLPDAHQEAPTAGSVILAGILLKFGTYGFLRFSPIMFPEATLCFTPFIIYLSAIAIYTSITTLRQDLKVIATSSISHMGV 319  
*NdhD1/T. vestitus/1-529* 200 -TLAAQDYALGFQLLYAGFLVAYGVLLTPVPLITWLPDAHQEAPTAPVHMLLAGILLKGGYGMIRITILLNPIITDFMAYPFIM-LSLWGMIMTSSICLRQTDLSLIAVSSVSHMALV 317

*Nqo13/T. thermophilus/1-469* 297 ALGVFSGTPEGANGGLYLAAASGVYTGGLFLA-GRLYERTGTLEIGRYRGLAQASPLAALALILFLAMVGLPGLSGFPPEFTLLLGAYKAS-----PWLAAFLSLVIAASAAAL 407  
*NuoM/E. coli/1-509* 327 LIAITYGSLQAYQGAIVIQMIAHLSAAGLFLC-GQLYERIHTRDRMRMGGLWSKMKWLPALSLFFAVATLGMPTGNGFVGFEFMLFGSFQVV-----PVITVISTFGLVFASVYSL 437  
*Nqo13/P. denitrificans/1-513* 325 TMGVFAANQIGVDGAIQMLSHGFIAGLFLCV-GVLYDRMHTREIDAYGGLVNRMPAYAVFMFFTHMANVGLPGTSGFVGFEFLTMGVFRVD-----TWVALVATSGVILSAAAL 435  
*Nu4M/Y. lipolytica/1-486* 314 ILGVCNSTSLGIYGSIVLGVAHGFVSPALFLVGGILLDRYHIRIYNNYKQVLTTPYQATYIIILSFANIGTPLTGNFTGEFLSQGGFIRN-----PIIGGISCISVLAAAIQL 425  
*ND4/M. musculus/1-459* 298 IASIMIQTPWSFGATMLMIAHGLTSSMLFCLA-NSNVERIHSRTIMARGLQMVPLMATWMLMASLANLALPPSINLMGELFTTMSLFSWS-----NFTIILMGINIIITGMSM 408  
*ND4/O. aries/1-459* 298 IVALIQTTPWSYMGATMLMIAHGLTSSMLFCLA-NSNVERIHSRTIMARGLQTLPLMAWMLLASLNLALPPTINLIGELFVWMTFSWS-----NITIIILMGVNVITALVSL 408  
*ND4/B. taurus/1-459* 298 IVALIQTTPWSYMGATMLMIAHGLTSSMLFCLA-NSNVERIHSRTIMARGLQTLPLMAWMLLASLNLALPPTINLIGELFVWMTFSWS-----NITIIILMGVNVITALVSL 408  
*ND4/H. sapiens/1-459* 298 VTAIIQTTPWSFTGAVILMIAHGLTSSMLFCLA-NSNVERIHSRTIMARGLQTLPLMAFWMLLASLANLALPPTINLIGELFVWMTFSWS-----NITIIILMGVNVITALVSL 408  
*ND4/A. thaliana/1-495* 320 TIGMFSPIQIGGSIILMLSHGLVSSALFLCV-GVLYDRHKTRLVRYGGLVSTMPNSTIFFSFTLANMSLPGTSFSGFEFLVLVGAFORN-----SLVATLAAALGMILGAAYSL 430  
*NdhD1/T. vestitus/1-529* 318 LIGIASFTNLGMSGAVLMQVSHLIGASLEFLV-GATDHTHTILEEMCGVQMKKIFAMFTACSLASLALGMSGFVALHMFVIGFATSDAYSLPFRVIVFLAAVGVLTPTIYL 435

*Nqo13/T. thermophilus/1-469* 408 TAFQKTFWEEGSG-----VKDLAGAVGFALLSVLALLLMGVFGYFARGHLPLAEAFKLLGGGA----- 469  
*NuoM/E. coli/1-509* 438 AMLHRYAVFGKAKSIASQ-ELPGMSLRELFMILLVLLVLLGFYROPILDTSHSAIGNIQQWFVNSVTTTRP----- 509  
*Nqo13/P. denitrificans/1-513* 436 WLYRRVTLGLQLIKE-SLK-SITDTPPRRWVFIPIAMTILGVYRPLVTDVTGPAVAALVQDYNQSQAPAVATAQASH----- 513  
*Nu4M/Y. lipolytica/1-486* 426 KLTNKL-TGSISS-YMH-RTNDVTIREKFINMILISTIGICQIMYNNLYWTVNNYIYII----- 486  
*ND4/M. musculus/1-459* 409 YMIITTQRGKLTNHI---NLQPSHTRELTLMALHMIPLILLTTSKLITGLTM----- 459  
*ND4/O. aries/1-459* 409 YMLITTQRGKHTHIN---NILPSFTRENALMSLHMLPLLLSLNPKIILGPLY----- 459  
*ND4/B. taurus/1-459* 409 YMLIMTQRGKYTYHIN---NISPSTRENALMSLHMLPLLLSLNPKIILGPLY----- 459  
*ND4/H. sapiens/1-459* 409 YMFTTTQWGLTHIN---NMKPSFTRENTLMFMHLSPIILLSLNPKIITGFS-- 459  
*ND4/A. thaliana/1-495* 431 WLYNRVVSGLKPD-FLH-KFSDLNGREVFIIFPLVGLVWVGVPKVFDCMHTSVSNLVQHGKFH----- 495  
*NdhD1/T. vestitus/1-529* 436 SMLREIFYGPENKELVEHEALVDAEPREVFIIACLVPIIGIGLYKLLTQIDYATGQVITARAREVPTLAQQTQEPGLGILPMVAPQLKANQA 529

**Supplementary Figure 18 (contd) | Sequence conservation in Nqo12 and Nqo13.** Multiple sequence alignment (MSA) of Nqo12 and Nqo13 from different species. The MSA was performed with ClustalΩ.<sup>16</sup> Residues with up to 50% sequence conservation are coloured by the ClustalX colouring scheme.

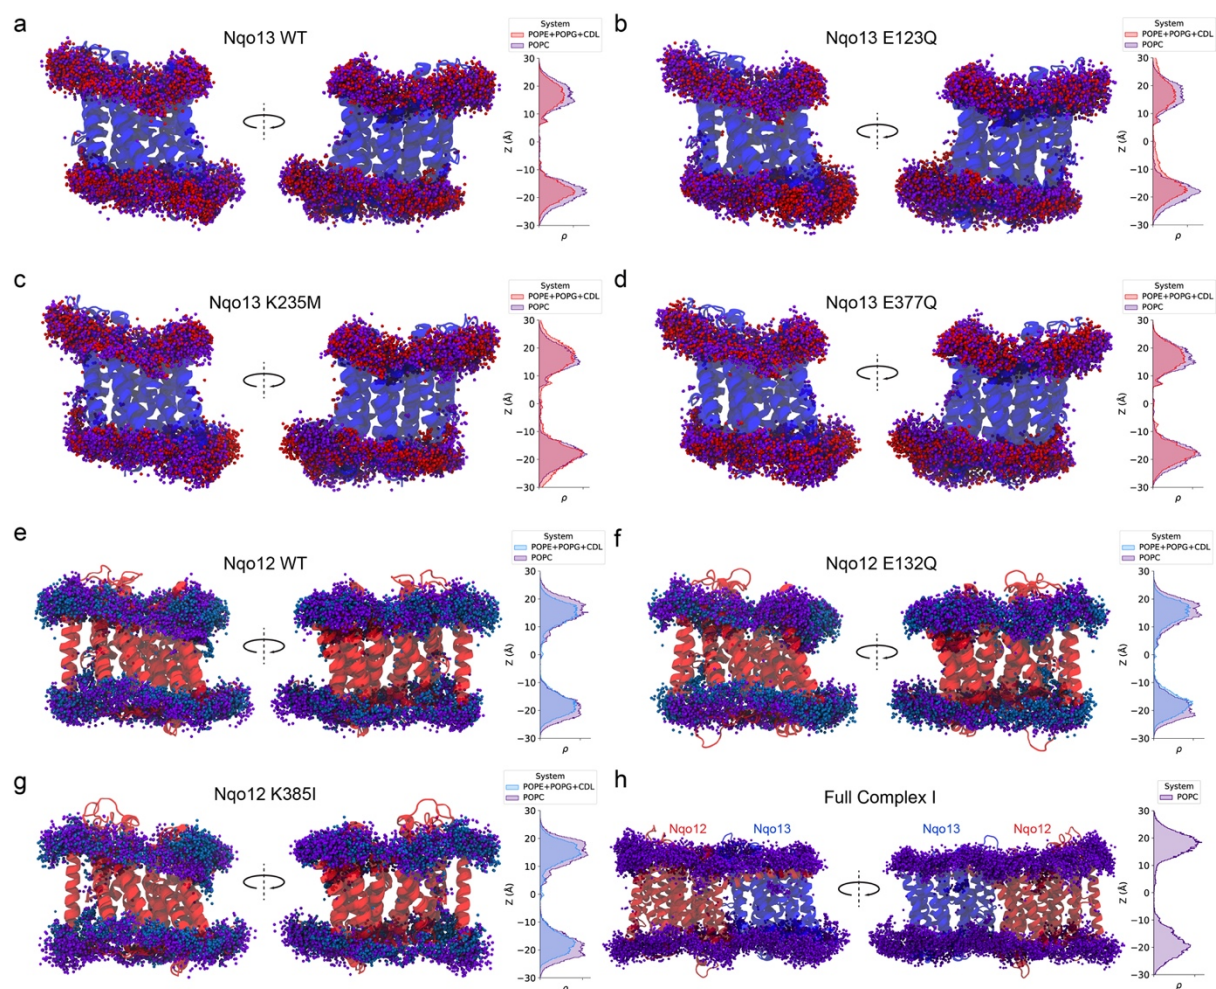

**Supplementary Figure 19 | Hydration analysis of the protein-lipid interface in the isolated antiporter constructs and in the full Complex I.** Left insets show a snapshot of the hydration ensemble with water molecules within 3 Å of protein and lipids. Right insets show the distribution of water molecules along the Z axis. The analyses were performed on the last 500 ns of the respective MD simulation, with structures extracted every 10 ns. **a-d)** MD simulations of the Nqo13 constructs. **a)** WT, **b)** E123Q, **c)** K235M, and **d)** E377Q. **e-g)** MD simulations of the Nqo12<sup>ΔTM</sup> constructs. **e)** WT, **f)** E132Q, and **g)** K385I. **h)** MD simulations of the full Complex I, showing water molecules around the protein-lipid interface at the Nqo12/Nqo13 subunits (based on simulation data from Ref. 7). Data are provided in the Source Data file.

**Supplementary Table 1 | Steady-state pH levels and kinetics of proton transfer** based on proteoliposome experiments using a weak acid/base or by ATPase-driven proton transport.

|                     | Potassium acetate |       |          | Methylamine hydrochloride |       |          |
|---------------------|-------------------|-------|----------|---------------------------|-------|----------|
| Construct           | Plateau pH        | SD    | <i>n</i> | Plateau pH                | SD    | <i>n</i> |
| EL                  | 7.05              | 0.013 | 3        | 7.69                      | 0.018 | 3        |
| AqpZ                | 7.04              | 0.017 | 6        | 7.68                      | 0.011 | 3        |
| WT <sup>12</sup>    | 7.09              | 0.028 | 6        | 7.70                      | 0.002 | 3        |
| E132Q <sup>12</sup> | 7.16              | 0.017 | 6        | 7.74                      | 0.002 | 3        |
| K385I <sup>12</sup> | 7.05              | 0.013 | 6        | 7.63                      | 0.003 | 3        |
| WT <sup>13</sup>    | 7.11              | 0.007 | 6        | 7.65                      | 0.008 | 3        |
| E123Q <sup>13</sup> | 7.14              | 0.002 | 3        | 7.67                      | 0.004 | 3        |
| K235M <sup>13</sup> | 7.05              | 0.011 | 6        | 7.64                      | 0.009 | 3        |
| E377Q <sup>13</sup> | 7.05              | 0.014 | 6        | 7.70                      | 0.011 | 3        |

| ATP synthase                  |            |      |          |                      |      |          |
|-------------------------------|------------|------|----------|----------------------|------|----------|
|                               | Linear fit |      |          |                      |      |          |
| Construct                     | avg. $k_1$ | SD   | <i>n</i> | Plateau $\Delta F^*$ | SD   | <i>n</i> |
| EL                            | 0.04       | 0.02 | 6        | 0.96                 | 0.01 | 6        |
| AqpZ                          | 4.42       | 0.49 | 6        | 0.09                 | 0.01 | 6        |
| F <sub>1</sub> F <sub>o</sub> | 5.56       | 0.40 | 6        | 0.07                 | 0.01 | 6        |
| WT <sup>12</sup>              | 2.53       | 0.28 | 6        | 0.33                 | 0.04 | 6        |
| E132Q <sup>12</sup>           | 0.58       | 0.18 | 6        | 0.71                 | 0.06 | 6        |
| K385I <sup>12</sup>           | 4.98       | 0.19 | 6        | 0.13                 | 0.02 | 6        |
| WT <sup>13</sup>              | 2.36       | 0.19 | 6        | 0.32                 | 0.03 | 6        |
| E123Q <sup>13</sup>           | 2.00       | 0.27 | 6        | 0.43                 | 0.04 | 6        |
| K235M <sup>13</sup>           | 2.72       | 0.28 | 5        | 0.31                 | 0.03 | 5        |

\*Extrapolated from a single exponential fit.

**Supplementary Table 2 | Orientation of Nqo modules in proteoliposomes by NTA-Atto 647N labelling.**

| <b>Construct</b>          | <b>Orientation ratio<br/>(outward/inward)</b> |
|---------------------------|-----------------------------------------------|
| <b>WT<sup>12</sup></b>    | 31/69                                         |
| <b>E132Q<sup>12</sup></b> | 18/82                                         |
| <b>K385I<sup>12</sup></b> | 27/73                                         |
| <b>WT<sup>13</sup></b>    | 29/71                                         |
| <b>E123Q<sup>13</sup></b> | 23/77                                         |
| <b>K235M<sup>13</sup></b> | 21/79                                         |
| <b>E377Q<sup>13</sup></b> | 28/72                                         |

**Supplementary Table 3 | Predicted  $pK_a$ s in the dissected antiporter-like subunit relative to the intact Complex I.** The  $pK_a$  computed based on PDB ID:6I0D<sup>6</sup>, and  $\Delta pK_a$ s of the isolated Nqo13 / Nqo12 constructs relative to WT intact CI based on MD ensemble (see *Supplementary methods*).

| <b>Nqo13</b> | <b><math>pK_a</math></b><br>X-ray, CI full | <b><math>pK_a</math></b><br>X-ray, 13 only | <b><math>\Delta pK_a</math></b><br>X-ray<br>CI full - 13 only | <b><math>\Delta pK_a</math></b><br>MD: CI full -<br>WT/Nqo13 | <b><math>\Delta pK_a</math></b><br>MD: CI full -<br>E123Q/Nqo13 | <b><math>\Delta\Delta pK_a</math></b><br>MD:<br>WT - E123Q |
|--------------|--------------------------------------------|--------------------------------------------|---------------------------------------------------------------|--------------------------------------------------------------|-----------------------------------------------------------------|------------------------------------------------------------|
| <b>K282</b>  | 15.0                                       | 15.8                                       | -0.8                                                          | -4.1                                                         | 0.4                                                             | +4.4                                                       |
| <b>D228</b>  | -4.7                                       | -3.8                                       | -0.9                                                          | -2.6                                                         | 0.5                                                             | +3.1                                                       |
| <b>H218</b>  | -0.7                                       | 0.5                                        | -1.2                                                          | -4.8                                                         | 2.2                                                             | +7.0                                                       |
| <b>K235</b>  | 8.6                                        | 9.8                                        | -1.2                                                          | -2.4                                                         | -1.3                                                            | +1.1                                                       |
| <b>H292</b>  | 2.9                                        | 6.8                                        | -3.9                                                          | -2.5                                                         | -1.9                                                            | +0.6                                                       |
| <b>E377</b>  | 5.8                                        | 4.7                                        | +1.1                                                          | -5.3                                                         | -1.6                                                            | +3.7                                                       |

| <b>Nqo12</b> | <b><math>pK_a</math></b><br>X-ray, CI full | <b><math>pK_a</math></b><br>X-ray, 12 only | <b><math>\Delta pK_a</math></b><br>X-ray<br>CI full - 12 only | <b><math>\Delta pK_a</math></b><br>MD: CI full -<br>WT/Nqo12 | <b><math>\Delta pK_a</math></b><br>MD: CI full -<br>E132Q/Nqo12 | <b><math>\Delta\Delta pK_a</math></b><br>MD:<br>WT - E132Q |
|--------------|--------------------------------------------|--------------------------------------------|---------------------------------------------------------------|--------------------------------------------------------------|-----------------------------------------------------------------|------------------------------------------------------------|
| <b>E346</b>  | 4.4                                        | 4.6                                        | -0.8                                                          | -0.1                                                         | +0.6                                                            | +0.7                                                       |
| <b>K292</b>  | 10.5                                       | 10.8                                       | -0.3                                                          | +0.6                                                         | +0.4                                                            | -0.2                                                       |
| <b>H241</b>  | -1.2                                       | -0.6                                       | -0.6                                                          | -3.8                                                         | -0.9                                                            | +2.9                                                       |
| <b>K329</b>  | 9.7                                        | 10.1                                       | -0.4                                                          | -2.2                                                         | +1.8                                                            | +4                                                         |
| <b>H325</b>  | -4.3                                       | -4.1                                       | -0.2                                                          | +0.0                                                         | +2.8                                                            | +2.8                                                       |
| <b>H321</b>  | 2.6                                        | 2.9                                        | -0.3                                                          | +2.3                                                         | +3.4                                                            | +1.1                                                       |
| <b>K385</b>  | 13.5                                       | 13.7                                       | -0.2                                                          | +4.7                                                         | +6.7                                                            | +2.0                                                       |
| <b>D386</b>  | 5.4                                        | 6.2                                        | -0.8                                                          | -2.0                                                         | -0.4                                                            | +1.6                                                       |

**Supplementary Table 4 | List of MD simulations.**

| Simulation   | System                                   | Time (ns)    | Modelled state                                                | Dimensions (Å)  | N atoms | N water molecules |
|--------------|------------------------------------------|--------------|---------------------------------------------------------------|-----------------|---------|-------------------|
| S1           | Nqo13-WT                                 | 1000         | Lys235 <sup>+</sup> /His292 <sup>0</sup> /Glu377 <sup>-</sup> | 83 x 81 x 89    | 59400   | 10900             |
| S2           | Nqo13-WT                                 | 1000         | Lys235 <sup>+</sup> /His292 <sup>0</sup> /Glu377 <sup>-</sup> | 83 x 81 x 89    | 59400   | 10900             |
| S3           | Nqo13-WT                                 | 1000         | Lys235 <sup>0</sup> /His292 <sup>0</sup> /Glu377 <sup>0</sup> | 83 x 81 x 89    | 59400   | 10900             |
| S4           | Nqo13-WT                                 | 1000         | Lys235 <sup>0</sup> /His292 <sup>0</sup> /Glu377 <sup>0</sup> | 83 x 81 x 89    | 59400   | 10900             |
| S5           | Nqo13-E123Q                              | 1000         | Lys235 <sup>+</sup> /His292 <sup>0</sup> /Glu377 <sup>-</sup> | 83 x 81 x 89    | 59400   | 10900             |
| S6           | Nqo13-E123Q                              | 1000         | Lys235 <sup>+</sup> /His292 <sup>0</sup> /Glu377 <sup>-</sup> | 83 x 81 x 89    | 59400   | 10900             |
| S7           | Nqo13-K235M                              | 1000         | His292 <sup>0</sup> /Glu377 <sup>-</sup>                      | 83 x 81 x 89    | 59400   | 10900             |
| S8           | Nqo13-K235M                              | 1000         | His292 <sup>0</sup> /Glu377 <sup>-</sup>                      | 83 x 81 x 89    | 59400   | 10900             |
| S9           | Nqo13-E377Q                              | 1000         | Lys235 <sup>+</sup> /His292 <sup>0</sup>                      | 83 x 81 x 89    | 59400   | 10900             |
| S10          | Nqo13-E377Q                              | 1000         | Lys235 <sup>+</sup> /His292 <sup>0</sup>                      | 83 x 81 x 89    | 59400   | 10900             |
| S11          | Nqo13-WT in PE:PG:CDL                    | 500          | Lys235 <sup>+</sup> /His292 <sup>0</sup> /Glu377 <sup>-</sup> | 100 x 100 x 105 | 97900   | 19200             |
| S12          | Nqo13-WT in PE:PG:CDL                    | 500          | Lys235 <sup>+</sup> /His292 <sup>0</sup> /Glu377 <sup>-</sup> | 100 x 100 x 105 | 97900   | 19200             |
| S13          | Nqo13-E123Q in PE:PG:CDL                 | 500          | Lys235 <sup>+</sup> /His292 <sup>0</sup> /Glu377 <sup>-</sup> | 100 x 100 x 105 | 97900   | 19200             |
| S14          | Nqo13-E123Q in PE:PG:CDL                 | 500          | Lys235 <sup>+</sup> /His292 <sup>0</sup> /Glu377 <sup>-</sup> | 100 x 100 x 105 | 97900   | 19200             |
| S15          | Nqo13-K235M in PE:PG:CDL                 | 500          | His292 <sup>0</sup> /Glu377 <sup>-</sup>                      | 100 x 100 x 105 | 97900   | 19200             |
| S16          | Nqo13-K235M in PE:PG:CDL                 | 500          | His292 <sup>0</sup> /Glu377 <sup>-</sup>                      | 100 x 100 x 105 | 97900   | 19200             |
| S17          | Nqo13-E377Q in PE:PG:CDL                 | 500          | Lys235 <sup>+</sup> /His292 <sup>0</sup>                      | 100 x 100 x 105 | 97900   | 19200             |
| S18          | Nqo13-E377Q in PE:PG:CDL                 | 500          | Lys235 <sup>+</sup> /His292 <sup>0</sup>                      | 100 x 100 x 105 | 97900   | 19200             |
| S19          | Nqo12 <sup>ATH</sup> -WT                 | 1000         | Lys329 <sup>+</sup> /Lys385 <sup>+</sup>                      | 101 x 103 x 95  | 98000   | 19400             |
| S20          | Nqo12 <sup>ATH</sup> -WT                 | 1000         | Lys329 <sup>+</sup> /Lys385 <sup>+</sup>                      | 101 x 103 x 95  | 98000   | 19400             |
| S21          | Nqo12 <sup>ATH</sup> -E132Q              | 1000         | Lys329 <sup>+</sup> /Lys385 <sup>+</sup>                      | 101 x 103 x 95  | 98000   | 19400             |
| S22          | Nqo12 <sup>ATH</sup> -E132Q              | 1000         | Lys329 <sup>+</sup> /Lys385 <sup>+</sup>                      | 101 x 103 x 95  | 98000   | 19400             |
| S23          | Nqo12 <sup>ATH</sup> -K385I              | 1000         | Lys329 <sup>+</sup>                                           | 101 x 103 x 95  | 98000   | 19400             |
| S24          | Nqo12 <sup>ATH</sup> -K385I              | 1000         | Lys329 <sup>+</sup>                                           | 101 x 103 x 95  | 98000   | 19400             |
| S25          | Nqo12 <sup>ATH</sup> -WT in PE:PG:CDL    | 1000         | Lys329 <sup>+</sup> /Lys385 <sup>+</sup>                      | 109 x 107 x 109 | 125300  | 28200             |
| S26          | Nqo12 <sup>ATH</sup> -WT in PE:PG:CDL    | 1000         | Lys329 <sup>+</sup> /Lys385 <sup>+</sup>                      | 109 x 107 x 109 | 125300  | 28200             |
| S27          | Nqo12 <sup>ATH</sup> -E132Q in PE:PG:CDL | 1000         | Lys329 <sup>+</sup> /Lys385 <sup>+</sup>                      | 109 x 107 x 109 | 125300  | 28200             |
| S28          | Nqo12 <sup>ATH</sup> -E132Q in PE:PG:CDL | 1000         | Lys329 <sup>+</sup> /Lys385 <sup>+</sup>                      | 109 x 107 x 109 | 125300  | 28200             |
| S29          | Nqo12 <sup>ATH</sup> -K385I in PE:PG:CDL | 1000         | Lys329 <sup>+</sup>                                           | 109 x 107 x 109 | 125300  | 28200             |
| S30          | Nqo12 <sup>ATH</sup> -K385I in PE:PG:CDL | 1000         | Lys329 <sup>+</sup>                                           | 109 x 107 x 109 | 125300  | 28200             |
| <b>TOTAL</b> |                                          | <b>26 μs</b> |                                                               |                 |         |                   |



**Supplementary Table 5 | List of designed primers.**

| Oligonucleotide name              | Sequence (5' → 3')                               |
|-----------------------------------|--------------------------------------------------|
| Nqo12 <sup>ATH</sup> extraction F | AAC TT TAAGAAGGAGATATACCATGGCGCTTCTCGGGACGATTCTC |
| Nqo12 <sup>ATH</sup> extraction R | ACCTTGGAAGTATAAAATTTTCCTTGCGCTGGAAGAAGACGAAACCCG |
| Nqo13 extraction F                | ATGGTGGTGCTGGCGGTTTC                             |
| Nqo13 extraction R                | GCAGCAGAACCGCCAGCACCACCATGGTAT                   |
| Nqo12 <sup>ATH</sup> E132Q F      | ATGTTTCATCGGCTGGCAGGGGGTGGGCCTG                  |
| Nqo12 <sup>ATH</sup> E132Q R      | CCAGCCGATGAACATCACC                              |
| Nqo13 E123Q F                     | TTTTCTTTCAGGCGGCGCTGATTCC                        |
| Nqo13 E123Q R                     | CCGCCTGAAAGAAAACGTAGAACACCAGCAGATCAC             |
| Nqo13 K235M F                     | TGTACATGGTGGGTGTTTTTTCGTTCTTTC                   |
| Nqo13 K235M R                     | CACCCACCATGTACAGGGTGCCCAG                        |
| Nqo13 E377Q F                     | TCCGGGTCAATTCCTGACCCTGCTGG                       |
| Nqo13 E377Q R                     | AGGAATTGACCCGGAACCGCTC                           |

**Supplementary Table 6 | Sequences of studied Nqo constructs.**

| Construct name                   | Sequence                                                                                                                                                                                                                                                                                                                                                                                                                                                                                                                                                                                                                                                                                                                                                                                                                                                              |
|----------------------------------|-----------------------------------------------------------------------------------------------------------------------------------------------------------------------------------------------------------------------------------------------------------------------------------------------------------------------------------------------------------------------------------------------------------------------------------------------------------------------------------------------------------------------------------------------------------------------------------------------------------------------------------------------------------------------------------------------------------------------------------------------------------------------------------------------------------------------------------------------------------------------|
| <b>Nqo12<sup>ATH</sup> WT</b>    | MALLGTILLPLLGFALLGLFGKRMREPLPGVLASGLVLASFLLGAGLLLSG<br>GARFQAEWLPGPFSLLLDNLSGFMILLIVTGVGFLIHVYAIGYMGGDPGY<br>SRFFAYFNLFIAMMLTLVLADSYPMFIGWEGVGLASFLFIGFWYKNAQY<br>ADSARKAFIVNRIGDLGFMLGMAILWALYGTLSISELKEAMEGPKLPNDLL<br>ALAGLLFLGAVGKSAQIPLMVWLPDAMAGTPVSALIHAATMVTAGVYL<br>IARSSFLYSVLPDVSYAIAVVGLLTAAYGALSFAFGQTDIKKIVAYSTISQLG<br>YMFLAAGVGAYWVALFHVFTHAFFKALLFLASGSVIHALGGEQDVRKMG<br>GLWKHLQPTRWHALIGALALGGLPLLSGFWSKDAILAATLTYPFGGVGF<br>YVGALLVAVLTAMYAMRWVFLVFLGEERGHHPHEAPPVMLWPNHLL<br>ALGSVLAGYLALPHPLPNVLEPFLKPALAEVEAHHLSLGAEWGLIALSAA<br>VALLGLWAGVFFQKGSAGSENLYFQGQFSKGEELFTGVVPILVELDG<br>DVNGHKFSVSGEGEGDATYGKLTCLKFICTTGKLPVPWPTLVTTLTYGVCQ<br>CFSRYPDHMKRHDFFKSAMPEGYVQERTISFKDDGNYKTRAEVKFEGD<br>TLVNRIELKGIDFKEDGNILGHKLEYNYNSHNVYITADKQKNGIKANFKIRH<br>NIEDGSVQLADHYQQNTPIGDGPVLLPDNHYLSTQSALS KDPNEKRDHM<br>VLEFVTAAGITHGMDLEYKTSHHHHHHHHHH*  |
| <b>Nqo12<sup>ATH</sup> E132Q</b> | MALLGTILLPLLGFALLGLFGKRMREPLPGVLASGLVLASFLLGAGLLLSG<br>GARFQAEWLPGPFSLLLDNLSGFMILLIVTGVGFLIHVYAIGYMGGDPGY<br>SRFFAYFNLFIAMMLTLVLADSYPMFIGWEGVGLASFLFIGFWYKNAQY<br>ADSARKAFIVNRIGDLGFMLGMAILWALYGTLSISELKEAMEGPKLPNDLL<br>ALAGLLFLGAVGKSAQIPLMVWLPDAMAGTPVSALIHAATMVTAGVYL<br>IARSSFLYSVLPDVSYAIAVVGLLTAAYGALSFAFGQTDIKKIVAYSTISQLG<br>YMFLAAGVGAYWVALFHVFTHAFFKALLFLASGSVIHALGGEQDVRKMG<br>GLWKHLQPTRWHALIGALALGGLPLLSGFWSKDAILAATLTYPFGGVGF<br>YVGALLVAVLTAMYAMRWVFLVFLGEERGHHPHEAPPVMLWPNHLLA<br>LGSVLAGYLALPHPLPNVLEPFLKPALAEVEAHHLSLGAEWGLIALSAAV<br>ALLGLWAGVFFQKGSAGSENLYFQGQFSKGEELFTGVVPILVELDGD<br>VNGHKFSVSGEGEGDATYGKLTCLKFICTTGKLPVPWPTLVTTLTYGVCQCF<br>SRYPDHMKRHDFFKSAMPEGYVQERTISFKDDGNYKTRAEVKFEGDTLV<br>NRIELKGIDFKEDGNILGHKLEYNYNSHNVYITADKQKNGIKANFKIRHNIE<br>DGSVQLADHYQQNTPIGDGPVLLPDNHYLSTQSALS KDPNEKRDHMVLL<br>EFVTAAGITHGMDLEYKTSHHHHHHHHHH* |
| <b>Nqo12<sup>ATH</sup> K385I</b> | MALLGTILLPLLGFALLGLFGKRMREPLPGVLASGLVLASFLLGAGLLLSG<br>GARFQAEWLPGPFSLLLDNLSGFMILLIVTGVGFLIHVYAIGYMGGDPGY<br>SRFFAYFNLFIAMMLTLVLADSYPMFIGWEGVGLASFLFIGFWYKNAQY<br>ADSARKAFIVNRIGDLGFMLGMAILWALYGTLSISELKEAMEGPKLPNDLL<br>ALAGLLFLGAVGKSAQIPLMVWLPDAMAGTPVSALIHAATMVTAGVYL<br>IARSSFLYSVLPDVSYAIAVVGLLTAAYGALSFAFGQTDIKKIVAYSTISQLG<br>YMFLAAGVGAYWVALFHVFTHAFFKALLFLASGSVIHALGGEQDVRKMG<br>GLWKHLQPTRWHALIGALALGGLPLLSGFWSKDAILAATLTYPFGGVGFY<br>VGALLVAVLTAMYAMRWVFLVFLGEERGHHPHEAPPVMLWPNHLLAL<br>GSVLAGYLALPHPLPNVLEPFLKPALAEVEAHHLSLGAEWGLIALSAAVA<br>LLGLWAGVFFQKGSAGSENLYFQGQFSKGEELFTGVVPILVELDGDV<br>NGHKFSVSGEGEGDATYGKLTCLKFICTTGKLPVPWPTLVTTLTYGVCQCF<br>SRYPDHMKRHDFFKSAMPEGYVQERTISFKDDGNYKTRAEVKFEGDTLV<br>VNRIELKGIDFKEDGNILGHKLEYNYNSHNVYITADKQKNGIKANFKIRHN<br>IEDGSVQLADHYQQNTPIGDGPVLLPDNHYLSTQSALS KDPNEKRDHMV<br>LEFVTAAGITHGMDLEYKTSHHHHHHHHHH* |
| <b>Nqo13 WT</b>                  | MVVLAVALLPVVFGALLLGLPRALGVLGAGLSFLLNLYLFLTHPGGVAHA<br>FQAPLLPGAGVYWFAGLDGLSALFFLTIALTVFLGALVARVEGRFLGLAL<br>LMEGLLLGLFAARDLLVFYVFEEAALIPALLMLLYYGGEGRTRALYTFVLF<br>TLVGSPLMLAAVLGARLLSGSPTFLELLELLAHPLQEEAAFWVFLGFALAF<br>AIKTPFLPLHAWLPPFHQENHPSGLADALGTLKYGVFAFFRAIPLAPEG<br>FAQAQGLLLFLAALSALYGAWVAFAAKDFKTLLAYAGLSHMGVAALGVFS<br>GTPEGAMGGLYLLAASGVYTGGLFLLAGRLYERTGTLEIGRGRGLAQSAP<br>GLAALALILFLAMVGLPGLSGFPGEFLTLLGAYKASPWLAALFLSVIASAA<br>YALTAFAQKTFWEEGGSGVKDLAGAEWGFALLSVLALLLMGVFPGYFARG<br>LHPLAEFAKLLGGENLYFQGQFSKGEELFTGVVPILVELDGDVNGHKFS<br>VSGEGEGDATYGKLTCLKFICTTGKLPVPWPTLVTTLTYGVCQFSRYPDH<br>MKRHDFFKSAMPEGYVQERTISFKDDGNYKTRAEVKFEGDTLVNRIELK<br>GIDFKEDGNILGHKLEYNYNSHNVYITADKQKNGIKANFKIRHNIEDGSVQ<br>LADHYQQNTPIGDGPVLLPDNHYLSTQSALS KDPNEKRDHMVLEFVTA<br>AGITHGMDLEYKTSHHHHHHHHHH*                                                         |
| <b>Nqo13 E123Q</b>               | MVVLAVALLPVVFGALLLGLPRALGVLGAGLSFLLNLYLFLTHPGGVAHAF                                                                                                                                                                                                                                                                                                                                                                                                                                                                                                                                                                                                                                                                                                                                                                                                                   |

|                    |                                                                                                                                                                                                                                                                                                                                                                                                                                                                                                                                                                                                                                                                                                                                                                                                                                                          |
|--------------------|----------------------------------------------------------------------------------------------------------------------------------------------------------------------------------------------------------------------------------------------------------------------------------------------------------------------------------------------------------------------------------------------------------------------------------------------------------------------------------------------------------------------------------------------------------------------------------------------------------------------------------------------------------------------------------------------------------------------------------------------------------------------------------------------------------------------------------------------------------|
|                    | <p>QAPLLPGAGVYWAFGLDGLSALFFLTIALTVFLGALVARVEGRFLGLALLM<br/> EGLLLGLFAARDLLVFYVFFQAAALIPALLMLYLYGGEGRTRALYTFVLFTLV<br/> GSLPMLAAVLGARLLSGSPTFLLDLLAHPLQEEAAFWVFLGFALAFAIKT<br/> PLFPLHAWLPPFHQENHPSGLADALGTLYKVGVF AFFRFAIPLAPEGFAQ<br/> AQGLLLFLAALSALYGAWVAFAAKDFKTLLAYAGLSHMGVAALGVFSGTP<br/> EGAMGGLYLLAASGVYTGGLFLLAGRLYERTGTLEIGRGRGLAQSAAPGLA<br/> ALALILFLAMVGLPGLSGFPGEFTLLGAYKASPWLAALAFLSVIASAAAYAL<br/> TAFQKTFWEEGGSGVKDLAAGWGFALLSVLALLLMGVFPGYFARGLHP<br/> LAEAFKLLGGENLYFQQQFSKGEELFTGVVPILVELDGDVNGHKFSVSG<br/> EGEGDATYGKLTCLKFICTTGKLPVPWPPTLVTTTLTYGVQCFSRYPDHMKRH<br/> DFFKSAMPEGYVQERTISFKDDGNYKTRAEVKFEGDTLVNRIELKGIDFKE<br/> DGNILGHKLEYNYN SHNVYITADKQKNGIKANFKIRHNIEDGSVQLADHYQ<br/> QNTPIGDGPVLLPDNHYLSTQSALS KDPNEKR DHMV LLEFVTAAGITHGM<br/> DELYKTSHHHHHHHHHH*</p>                                                          |
| <b>Nqo13 K235M</b> | <p>MVVLA VLLPVVFGALLLGLPRALGVLGAGLSFLLNLYLFLTHPGGVAHAF<br/> QAPLLPGAGVYWAFGLDGLSALFFLTIALTVFLGALVARVEGRFLGLALLM<br/> EGLLLGLFAARDLLVFYVFFEAALIPALLMLYLYGGEGRTRALYTFVLFTLV<br/> GSLPMLAAVLGARLLSGSPTFLLDLLAHPLQEEAAFWVFLGFALAFAIKT<br/> PLFPLHAWLPPFHQENHPSGLADALGTLYMVGVF AFFRFAIPLAPEGFAQ<br/> AQGLLLFLAALSALYGAWVAFAAKDFKTLLAYAGLSHMGVAALGVFSGTP<br/> EGAMGGLYLLAASGVYTGGLFLLAGRLYERTGTLEIGRGRGLAQSAAPGLA<br/> ALALILFLAMVGLPGLSGFPGEFTLLGAYKASPWLAALAFLSVIASAAAYAL<br/> TAFQKTFWEEGGSGVKDLAAGWGFALLSVLALLLMGVFPGYFARGLHP<br/> LAEAFKLLGGENLYFQQQFSKGEELFTGVVPILVELDGDVNGHKFSVSG<br/> EGEGDATYGKLTCLKFICTTGKLPVPWPPTLVTTTLTYGVQCFSRYPDHMKRH<br/> DFFKSAMPEGYVQERTISFKDDGNYKTRAEVKFEGDTLVNRIELKGIDFKE<br/> DGNILGHKLEYNYN SHNVYITADKQKNGIKANFKIRHNIEDGSVQLADHYQ<br/> QNTPIGDGPVLLPDNHYLSTQSALS KDPNEKR DHMV LLEFVTAAGITHGM<br/> DELYKTSHHHHHHHHHH*</p>  |
| <b>Nqo13 E377Q</b> | <p>MVVLA VLLPVVFGALLLGLPRALGVLGAGLSFLLNLYLFLTHPGGVAHAF<br/> QAPLLPGAGVYWAFGLDGLSALFFLTIALTVFLGALVARVEGRFLGLALLM<br/> EGLLLGLFAARDLLVFYVFFEAALIPALLMLYLYGGEGRTRALYTFVLFTLV<br/> GSLPMLAAVLGARLLSGSPTFLLDLLAHPLQEEAAFWVFLGFALAFAIKT<br/> PLFPLHAWLPPFHQENHPSGLADALGTLYKVGVF AFFRFAIPLAPEGFAQ<br/> AQGLLLFLAALSALYGAWVAFAAKDFKTLLAYAGLSHMGVAALGVFSGTP<br/> EGAMGGLYLLAASGVYTGGLFLLAGRLYERTGTLEIGRGRGLAQSAAPGLA<br/> ALALILFLAMVGLPGLSGFPGEFTLLGAYKASPWLAALAFLSVIASAAAYAL<br/> TAFQKTFWEEGGSGVKDLAAGWGFALLSVLALLLMGVFPGYFARGLHP<br/> PLAEAFKLLGGENLYFQQQFSKGEELFTGVVPILVELDGDVNGHKFSVS<br/> GEGEGDATYGKLTCLKFICTTGKLPVPWPPTLVTTTLTYGVQCFSRYPDHMK<br/> RHDFFKSAMPEGYVQERTISFKDDGNYKTRAEVKFEGDTLVNRIELKGI<br/> DFKEDGNILGHKLEYNYN SHNVYITADKQKNGIKANFKIRHNIEDGSVQL<br/> ADHYQQNTPIGDGPVLLPDNHYLSTQSALS KDPNEKR DHMV LLEFVTA<br/> AGITHGMDELYKTSHHHHHHHHHH*</p> |

**Supplementary Table 7 | Expression strains and tested plasmids.**

| Expression strain                | Plasmid | Construct                  | Properties                           |
|----------------------------------|---------|----------------------------|--------------------------------------|
| BL21 (DE3), C41 (DE3), C43 (DE3) | pET21a  | His-TEV-Nqo13              | No expression                        |
| BL21 (DE3), C41 (DE3), C43 (DE3) | pBAD    | His-TEV-Nqo13              | No expression                        |
| BL21 (DE3), C41 (DE3), C43 (DE3) | pWALDO  | Nqo13-TEV-GFP-His          | Low expression                       |
| BL21 (DE3)                       | pWALDO  | Nqo12-TEV-sfGFP-His        | Low expression, no binding to Ni-NTA |
| LEMO21 (DE3)                     | pWALDO  | Nqo12-linker-TEV-sfGFP-His | Successful                           |
| LEMO21 (DE3)                     | pWALDO  | Nqo13-TEV-His              | Successful                           |

**Supplementary Table 8 | Benchmarking the proton transfer energetics.** The model system contains  $N=137$  atoms (see also Supplementary Fig. 9). Electronic energies were evaluated at def2-TZVP/ $\epsilon=4$  (DFT)<sup>17-23</sup> and def2-TZVPPD/ $\epsilon=4$  (RPA)<sup>24</sup> levels.

| State      | B3LYP-D3 | CAM-B3LYP-D3 | CAMh-B3LYP-D3 | TPSSh-D3 | $\omega$ B97X-D | RPA  |
|------------|----------|--------------|---------------|----------|-----------------|------|
| <b>I</b>   | 0.0      | 0.0          | 0.0           | 0.0      | 0.0             | 0.0  |
| <b>II</b>  | 6.3      | 6.1          | 6.4           | 6.1      | 6.9             | 8.1  |
| <b>III</b> | 4.6      | 4.5          | 4.4           | 4.7      | 4.7             | 4.8  |
| <b>IV</b>  | 17.8     | 17.6         | 17.8          | 16.4     | 19.1            | 18.8 |
| <b>V</b>   | 8.3      | 8.7          | 8.4           | 8.4      | 8.0             | 6.5  |

**Supplementary Table 9 | List of QM/MM simulations**

| Simulation | System      | QM region                                                                                        | Description                                       | Length (ps)           | Method   |
|------------|-------------|--------------------------------------------------------------------------------------------------|---------------------------------------------------|-----------------------|----------|
| 1          | Nqo13 WT    | K235, H292, E377, T232, S291, S318, Y321, S402, Y405, 10 H <sub>2</sub> O ( $N=137$ )            | Lateral proton transfer pathway from K235 to E377 | 75 x 2.3 ps = 173 ps  | US/WHAM  |
| 2          | Nqo13 E123Q | K235, H292, E377, T232, S291, S318, Y321, S402, Y405, 10 H <sub>2</sub> O ( $N=137$ )            | Lateral proton transfer pathway from K235 to E377 | 75 x 2.3 ps = 173 ps  | US/WHAM  |
| 3          | Nqo12 WT    | K329, K385, H321, H325, S298, Q302, Y305, F328, S384, T413, Y416, 4 H <sub>2</sub> O ( $N=149$ ) | Lateral proton transfer pathway from K329 to K385 | 52 x 2.3 ps = 120 ps  | US/WHAM  |
| 4          | Nqo12 E132Q | K329, K385, H321, H325, S298, Q302, Y305, F328, S384, T413, Y416, 4 H <sub>2</sub> O ( $N=149$ ) | Lateral proton transfer pathway from K329 to K385 | 52 x 2.3 ps = 120 ps  | US/WHAM  |
| 5          | Nqo13 WT    | K235, H211, T232, T322, F217, H218, D228, F326, N221, K282, 9 H <sub>2</sub> O ( $N=148$ )       | N-side medial proton transfer from K282 to K235   | 10 x 22.5 ps = 225 ps | MWE/MBAR |

## Supplementary Methods

### Derivation of an analytical model for ion-pair induced barrier tuning

An analytical model of the ion-pair induced barrier reduction was derived based on an electrostatic consideration. To this end, the influence of the ion-pair opening on the transition state energy was modelled by considering the electrical tuning effect of moving the proton from the middle lysine residue (Lys235 in Nqo13) to a nearby protonated water species ( $\text{H}_3\text{O}^+$  or  $\text{H}_5\text{O}_2^+$  at the transition state  $E^\ddagger$ ), located at a distance  $a$  from the latter (Supplementary Fig. 7). The effect of the electrostatic tuning was modelled by summing over all charged interactions,

$$V_{ij}(r) = \frac{e^2}{4\pi\epsilon\epsilon_0} \sum_{i>j} \frac{q_i q_j}{r_{ij}} \quad (1)$$

leading to the barrier tuning based on ion-pair distance  $x$ ,

$$\Delta E^\ddagger(x) = \alpha \left[ \frac{1}{R+a-(x-d)} - \frac{1}{R+d+a} - \frac{1}{R-(x-d)} + \frac{1}{R+d} \right] \quad (2)$$

where  $\alpha = q_i q_j e^2 / 4\pi\epsilon\epsilon_0 = 332 \text{ kcal mol}^{-1} \text{ \AA}^{-1}/\epsilon$ ,  $R$  is the distance between the middle lysine and the ion pair,  $d$  and  $x$  are the distances between the ion-paired residues in the respective closed and open conformations, and,  $a$  is the distance between the protonated water species and Lys235. The dielectric constant of the medium was modelled with  $\epsilon=10$ . The geometry of the model is shown in Supplementary Fig. 7, with  $R=15.9 \text{ \AA}$ ,  $a=9.2 \text{ \AA}$ ,  $d=3.2 \text{ \AA}$ .

### Poisson-Boltzmann Electrostatic with Monte Carlo sampling

$\text{pK}_a$  values for titratable residues in Nqo12 and Nqo13 were estimated based on Poisson-Boltzmann (PB) electrostatic calculations together with Monte Carlo (MC) sampling. To this end, the protein residues were treated as explicit atoms using the CHARMM36m force field<sup>1</sup>. The protein surroundings were modelled as an inhomogeneous polarisable low-dielectric ( $\epsilon=10$ ) medium, with explicit lipid molecules included from the MD simulations. The bulk water was modelled as a homogenous high dielectric medium ( $\epsilon=80$ ). The PB equations were solved numerically using the Adaptive Poisson-Boltzmann Solver (APBS)<sup>2</sup>. The  $2^N$  protonation states in the protein were sampled by allowing for single, double, and triple moves in the MC routine, as implemented in Karlsberg<sup>+3-5</sup>. The sidechain atoms were optimised upon protonation state changes using the ABNR minimiser in CHARMM<sup>25</sup>. The  $\text{pK}_a$ s were estimated based on their shifts from experimental solvent (water)  $\text{pK}_a$  values,

$$\text{pK}_a(\text{protein}) = \text{pK}_a(\text{water}) + \Delta \text{pK}_a(\text{water} \rightarrow \text{protein})$$

with solvent  $\text{pK}_a$ s of Glu (4.1), Asp (3.9), Tyr (10.1), His (6.04), and Lys (10.5). The  $\Delta \text{pK}_a$  term was calculated based on changes in the electrostatic interactions of the protonated (AH) and deprotonated (A) species with surrounding protein background charges ( $\Delta G_{\text{back}}$ ), the Born desolvation energy ( $\Delta G_{\text{Born}}$ ) for moving AH and A from water ( $\epsilon=80$ ) to the protein medium ( $\epsilon=10$ ), and from interaction of the  $2^N$  possible protonation states in the protein medium ( $\Delta G_{ij}^{\text{protein}}$ ),



$$\Delta pK_a (\text{water} \rightarrow \text{protein}) = \Delta \Delta G^{\text{water} \rightarrow \text{protein}} / 2.303 RT \quad (3)$$

with

$$\Delta \Delta G^{\text{water} \rightarrow \text{protein}} = \Delta G_{\text{Born}} + \Delta G_{\text{back}} + \sum_{i \neq j} \Delta G_{ij}^{\text{protein}} \quad (4)$$

The calculations were performed for the isolated Nqo12 and Nqo13 models based on the X-ray structure of *Thermus thermophilus* Complex I (PDB ID: 6i0d<sup>6</sup>), and based on MD simulations of the WT-Nqo13, E132Q-Nqo13, WT-Nqo12, E123Q-Nqo12 models (see *Methods*, main text). The  $pK_a$  shifts were also compared to MD simulations of the intact Complex I from *T. thermophilus*<sup>7</sup>.

### Analysis of hydration profiles

The analysis and visualisation of hydration profiles from MD simulations were carried out using CAVER v.3.0<sup>8</sup> and Visual Molecular Dynamics (VMD)<sup>9</sup>. Proton pathways were first characterised by starting the tunnel search from Lys329 in Nqo12<sup>ΔTH</sup> or Lys235 in Nqo13, using a probe radius set to 0.9 Å. Sidechains of histidine residues, Phe378<sup>Nqo13</sup>, and the headgroups of charged residues (Glu, Asp, Lys, Arg) were excluded from the initial tunnel search. The hydration profiles were computed based on the identified tunnels, by probing the water occupancy within a 2 Å radius along the tunnel, based on the last 100 ns of a given trajectory. The hydration percentage was calculated as the ratio between occupied water molecules at a given tunnel coordinate and the total number of analysed frames.

### Constant-pH MD simulations

Constant-pH MD (cphmd) simulations were performed based on the 1 μs MD simulations of Nqo13 embedded in a POPC membrane and solvated in a water box (see main text *Methods*). The cphmd simulations were performed using 15 independent simulations, with 20 replicas each, sampling a pH range from 0.5 to 13.5, and with initial protonation states assigned from the PBE/MC calculations (see above). Each simulation included 1000 minimisation steps, followed by 500 cycles of 1000-10000 production steps and 7500 non-equilibrium switching steps, leading to a total simulation length of *ca.* 50 ns. Final  $pK_a$  values were computed based on all sampled conformations using the PBE/MC methodology (see above) by re-weighting each conformation by its protonation probability and electrostatic energy to derive average protonation states. The cphmd simulations were performed, as implemented in NAMD<sup>10-12</sup>, and  $pK_a$  calculations using an in-house APBS/Karlsberg+ implementation<sup>2-5</sup>.

## Supplementary Discussion

### Conformational changes coupled to proton transport

To test how the proton transfer reactions coupled to conformational changes in the antiporter-like subunits, we performed additional MD simulations in multiple states. In the WT-Nqo13, we find that upon transfer of the proton from Lys235 to Glu377, mimicking a proton transfer step along the central pathway, the sidechain of His292 flips to a different rotameric state, suggesting that the conformation of His292 could affect the back transfer of protons in the reverse direction (*cf.* also Refs.<sup>13, 14</sup>, Supplementary Fig. 1g). Moreover, we note that the deprotonation of the Lys235 leads conformational changes in conserved residues in TM7a/b and TM8 (Supplementary Fig. 1h) that could regulate the proton uptake from the N-side bulk. The constant pH-MD simulations (see *Supplementary Methods*) further support conformational changes around the broken TM7a/b helix, suggesting that the effective  $pK_a$  of Lys235 is around 9.3 in the WT-Nqo13, and shifts to 6.5 for E132Q-Nqo13 (Supplementary Fig. 16).

## Supplementary References

- Best, R. B., Zhu, X., Shim, J., Lopes, P. E. M., Mittal, J., Feig, M. & MacKerell, A. D. Optimization of the additive CHARMM all-atom protein force field targeting improved sampling of the backbone  $\phi$ ,  $\psi$  and side-chain  $\chi_1$  and  $\chi_2$  Dihedral Angles. *J. Chem. Theory Comput.* **8**, 3257–3273 (2012).
- Baker, N. A., Sept, D., Joseph, S., Holst M. J. & McCammon, J. A. Electrostatics of nanosystems: Application to microtubules and the ribosome. *Proc. Natl. Acad. Sci. USA* **98**, 10037–10041 (2001).
- Meyer, T., Kieseritzky, G., & Knapp, E.-W. Electrostatic pKa computations in proteins: Role of internal cavities. *Proteins* **79**, 3320–3332 (2011).
- Kieseritzky, G., & Knapp, E.-W. Improved pKa prediction: combining empirical and semimicroscopic methods. *J. Comput. Chem.* **29**, 2575–2581 (2008).
- Rabenstein, B., Ullmann, G. M., & Knapp, E.-W. Calculation of protonation patterns in proteins with structural relaxation and molecular ensembles - application to the photosynthetic reaction center. *Eur. Biophys. J.* **27**, 626–637 (1998).
- Gutiérrez-Fernández, J., Kaszuba, K., Minhas, G. S., Baradaran, R., Tambalo, M., Gallagher, D. T. & Sazanov, L. A. Key role of quinone in the mechanism of respiratory complex I. *Nat. Commun.* **11**, 4135 (2020).
- Di Luca, A., Gamiz-Hernandez A. P. & Kaila, V. R. I., Symmetry-related proton transfer pathways in respiratory complex I. *Proc. Nat. Acad. Sci. USA* **114**, E6314–E6321 (2017).
- Chovancova, E., *et al.* CAVER 3.0: a tool for the analysis of transport pathways in dynamic protein structures. *PLoS Comput. Biol.*, **8**, e1002708 (2012).
- Humphrey, W. A., Dalke, A. & Schulten, K. VMD: Visual molecular dynamics. *J. Mol. Graph.* **14**, 33–38 (1996).
- Stern, H.A. Molecular simulation with variable protonation states at constant pH. *J. Chem. Phys.* **126** (2007).
- Chen, Y. & Roux, B. Constant-pH Hybrid Nonequilibrium Molecular Dynamics–Monte Carlo Simulation Method. *J. Chem. Comput. Theo.* **11**, 3919–3931 (2015).
- Radak, B.K. *et al.* Constant-pH Molecular Dynamics Simulations for Large Biomolecular Systems. *J. Chem. Comput. Theo.* **13**, 5933–5944 (2017).
- Mühlbauer, M. E. *et al.*, Water-gated proton transfer dynamics in respiratory complex I. *J. Am. Chem. Soc.* **142**, 13718–13728 (2020).
- Lee, Y., Haapanen, O., Altmeyer, A., Kühlbrandt, W., Sharma, V. & Zickermann, V. Ion transfer mechanisms in Mrp-type antiporters from high resolution cryoEM and molecular dynamics simulations. *Nat. Commun.* **13**, 6091. (2022).
- Scarciglia A, Di Gregorio E, Aime S, Ferrauto G. Effects of Cations on HPTS Fluorescence and Quantification of Free Gadolinium Ions in Solution; Assessment of Intracellular Release of Gd<sup>3+</sup> from Gd-Based MRI Contrast Agents. *Molecules*. **27**, 2490 (2022).
- Sievers, F., Wilm, A., Dineen, D.; Gibson, T. J., Karplus, K., Li, W., Lopez, R., McWilliam, H., Remmert, M., Söding, J., Thompson, J. D. & Higgins, D. G. Fast, Scalable Generation of High-quality Protein Multiple Sequence Alignments Using Clustal Omega. *Mol. Syst. Biol.* **7**, 539, (2011).
- Becke, A. D. Density-functional Thermochemistry. III. The Role of Exact Exchange. *J. Chem. Phys.* **98**, 5648–5652 (1993).
- Lee, C., Yang, W. & Parr, R. G. Development of the Colle-Salvetti Correlation-Energy Formula into a Functional of the Electron Density. *Phys. Rev. B* **37**, 785–789 (1988).
- Grimme, S., Antony, J., Ehrlich, S. & Krieg, H. A Consistent and Accurate *Ab Initio* Parametrization of Density Functional Dispersion Correction (DFT-D) for the 94 Elements H–Pu. *J. Chem. Phys.* **132**, 154104 (2010).
- Yanai, T., Tew, D. P. & Handy, N. C. A New Hybrid Exchange–Correlation Functional Using the Coulomb-Attenuating Method (CAM-B3LYP). *Chemical Physics Letters* **393**, 51–57 (2004).
- Shao, Y., Mei, Y., Sundholm, D. & Kaila, V. R. I. Benchmarking the Performance of Time-Dependent Density Functional Theory Methods on Biochromophores. *J. Chem. Theory Comput.* **16**, 587–600 (2020).
- Tao, J., Perdew, J. P., Staroverov, V. N. & Scuseria, G. E. Climbing the Density Functional Ladder: Nonempirical Meta–Generalized Gradient Approximation Designed for Molecules and Solids. *Phys. Rev. Lett.* **91**, 146401 (2003).
- Chai, J.-D. & Head-Gordon, M. Long-Range Corrected Hybrid Density Functionals with Damped Atom–Atom Dispersion Corrections. *Phys. Chem. Chem. Phys.* **10**, 6615 (2008).
- Chen, G.P., Voora, V.K., Agee, M.M., Balasubramani, S.G. & Furche, F. Random-Phase Approximation Methods. *Annu. Rev. Phys. Chem.* **68**, 421–445 (2017).
- Brooks, B.R. *et al.* CHARMM: The biomolecular simulation program. *J. Comput. Chem.* **30**, 1545–1614 (2009).
